# Supplementary material
Source: ML conference proceedings conference paper supplement (https://proceedings.neurips.cc/paper_files/paper/2016/hash/2451041557a22145b3701b0184109cab-Abstract.html)
Supplement: Supplementary file [file 2451041557a22145b3701b0184109cab-Supplemental.zip]

## Supplementary Information

### A Some Useful Technical Lemmas

**Lemma 1.** Suppose that  $\epsilon \in \mathbb{R}^n$  has independent identically distributed components, each of which has a sub-Gaussian distribution with parameter  $\sigma^2$ , then

$$\mathbb{P}\left(\frac{\|B\epsilon\|_\infty}{\sigma} \geq z\right) \leq 2q \exp\left(-\frac{z^2}{2\|B\|_2^2}\right) \quad (B \in \mathbb{R}^{q \times n}, z \geq 0), \quad (\text{A.1})$$

$$\mathbb{P}\left(\frac{\|\epsilon\|_2^2}{n\sigma^2} \geq 1+z\right) \leq \exp\left(-\frac{n(z - \log(1+z))}{2}\right) \quad (z \geq 0). \quad (\text{A.2})$$

Moreover, by (A.1) we have that for  $B \in \mathbb{R}^{q \times n}$ , with probability not less than  $1 - 2q/m^2$ ,

$$\|B\epsilon\|_\infty \leq 2\sigma \cdot \|B\|_2 \sqrt{\log m}. \quad (\text{A.3})$$

By (A.2) we have that with probability not less than  $1 - \exp(-4n/5)$ ,

$$\|\epsilon\|_2 \leq 2\sigma\sqrt{n}. \quad (\text{A.4})$$

*Proof.* As for (A.1), let  $B = (B_{i,j})_{q \times n}$  and  $1 \leq i \leq q$ , it is well-known that

$$B_{i,\cdot}\epsilon = B_{i,1}\epsilon_1 + B_{i,2}\epsilon_2 + \cdots + B_{i,n}\epsilon_n$$

is also sub-Gaussian, with parameter  $b_i^2 = (B_{i,1}^2 + \cdots + B_{i,n}^2)\sigma^2$ . Thus

$$\mathbb{P}(\|B\epsilon\|_\infty \geq z) \leq q \cdot \max_{1 \leq i \leq q} \mathbb{P}(|B_{i,\cdot}\epsilon| \geq z) \leq 2q \exp\left(-\frac{z^2}{2b_i^2}\right) \leq 2q \exp\left(-\frac{z^2}{2\|B\|_2^2}\right).$$

As for (A.2), note that for  $0 \leq \zeta < 1/2$ ,

$$\begin{aligned} \mathbb{P}\left(\frac{\|\epsilon\|_2^2}{n\sigma^2} \geq 1+z\right) &\leq \mathbb{P}\left(\exp\left(\frac{\zeta\|\epsilon\|_2^2}{\sigma^2}\right) \geq \exp(\zeta n(1+z))\right) \\ &\leq \exp(-\zeta n(1+z)) \mathbb{E}\left[\exp\left(\frac{\zeta\|\epsilon\|_2^2}{\sigma^2}\right)\right] = \exp(-\zeta n(1+z)) \left(\mathbb{E}\left[\exp\left(\frac{\zeta\epsilon_1^2}{\sigma^2}\right)\right]\right)^n \\ &\leq \exp(-\zeta n(1+z)) \cdot \left(\frac{1}{1-2\zeta}\right)^{n/2}. \end{aligned}$$

Take  $\zeta = z/(2(1+z)) \in [0, 1/2)$ , and (A.2) follows.  $\square$

**Lemma 2.**  $\Sigma_{S,S} \succ 0$  if and only if  $\ker(D_{S^c}) \cap \ker(X) \subseteq \ker(D_S)$ .

*Proof.* Define  $Q = (D_S^T, D_{S^c}^T, \sqrt{\nu}X^T/\sqrt{n})^T$ , and note that for any  $\xi \in \mathbb{R}^s$ ,

$$\left\|\begin{pmatrix} \xi \\ 0 \\ 0 \end{pmatrix} - Q(Q^T Q)^\dagger Q^T \begin{pmatrix} \xi \\ 0 \\ 0 \end{pmatrix}\right\|_2^2 = \begin{pmatrix} \xi \\ 0 \\ 0 \end{pmatrix}^T (I_m - Q(Q^T Q)Q^T) \begin{pmatrix} \xi \\ 0 \\ 0 \end{pmatrix} = \xi^T \Sigma_{S,S} \xi. \quad (\text{A.5})$$

If  $\ker(D_{S^c}) \cap \ker(X) \subseteq \ker(D_S)$ , then for any  $\xi \in \mathbb{R}^s$  satisfying  $\xi^T \Sigma_{S,S} \xi = 0$ , (A.5) leads to  $(\xi^T, 0, 0)^T = Q\beta$  for some  $\beta$ , implying

$$\xi - D_S \beta = 0, \quad D_{S^c} \beta = 0, \quad X\beta = 0 \implies \beta \in \ker(D_{S^c}) \cap \ker(X) \subseteq \ker(D_S) \implies \xi = D_S \beta = 0.$$

Therefore,  $\Sigma_{S,S} \succ 0$ . Conversely, if  $\Sigma_{S,S} \succ 0$ , then for any  $\beta \in \ker(D_{S^c}) \cap \ker(X)$ , since

$$\begin{aligned} (D_S \beta)^T \Sigma_{S,S} (D_S \beta) &= \left\|\begin{pmatrix} D_S \beta \\ 0 \\ 0 \end{pmatrix} - Q(Q^T Q)^\dagger Q^T \begin{pmatrix} D_S \beta \\ 0 \\ 0 \end{pmatrix}\right\|_2^2 = \min_{\beta'} \left\|\begin{pmatrix} D_S \beta \\ 0 \\ 0 \end{pmatrix} - Q\beta'\right\|_2^2 \\ &\leq \left\|\begin{pmatrix} D_S \beta \\ 0 \\ 0 \end{pmatrix} - Q\beta\right\|_2^2 = \left\|\begin{pmatrix} D_S \beta \\ 0 \\ 0 \end{pmatrix} - \begin{pmatrix} D_S \beta \\ D_{S^c} \beta \\ \sqrt{\nu}X\beta/\sqrt{n} \end{pmatrix}\right\|_2^2 = 0, \end{aligned}$$

which implies  $D_S \beta = 0$ , i.e.  $\beta \in \ker(D_S)$ . So  $\ker(D_{S^c}) \cap \ker(X) \subseteq \ker(D_S)$ .  $\square$

**Lemma 3.** Adopt the notation from (2.9) to (2.11).  $\beta \in L$  if and only if

$$\beta = V\delta + \tilde{V}V_1\xi, \text{ where } \delta = V^T\beta, \xi = V_1^T\tilde{V}^T\beta.$$

*Proof.* Note that

$$I = VV^T + \tilde{V}\tilde{V}^T = VV^T + \tilde{V}\left(V_1V_1^T + \tilde{V}_1\tilde{V}_1^T\right)\tilde{V}^T.$$

Right multiplying  $\beta$  on both side leads to

$$\beta = V\delta + \tilde{V}V_1\xi + \tilde{V}\tilde{V}_1\left(\tilde{V}_1^T\tilde{V}^T\beta\right). \quad (\text{A.6})$$

It suffices to show

$$\ker\left(\tilde{V}_1^T\tilde{V}^T\right) = L, \text{ which is equivalent to } L' := \text{Im}\left(\tilde{V}\tilde{V}_1\right) = L^\perp (= \ker(X) \cap \ker(D)).$$

For any  $\beta \in L'$ , we have  $X\beta = 0$ ,  $D\beta = 0$  since  $X\tilde{V}\tilde{V}_1 = 0$ ,  $D\tilde{V} = 0$ , so  $\beta \in L^\perp$ . Conversely, if  $\beta \in L^\perp$ , left multiplying  $D$  on both sides of (A.6) leads to  $\delta = 0$ . Then left multiplying  $X$  on both sides of (A.6) further leads to  $\xi = 0$ . Now (A.6) tells that  $\beta \in L'$ . So  $L' = L^\perp$ .  $\square$

**Lemma 4.** Adopt the notation from (2.9) to (2.11). Define  $B := \Lambda^2 + \nu V^T X^* (I - U_1 U_1^T) X V$ . We have

$$DA^\dagger = U\Lambda B^{-1}V^T \left( I - \frac{1}{\sqrt{n}} X^T U_1 \Lambda_1^{-1} V_1^T \tilde{V}^T \right). \quad (\text{A.7})$$

Consequently,

$$\Sigma = (I - DA^\dagger D^T) / \nu = (I - U\Lambda B^{-1} \Lambda U^T) / \nu. \quad (\text{A.8})$$

*Proof.* Note that

$$\begin{aligned} \begin{pmatrix} V^T \\ \tilde{V}^T \end{pmatrix} A \begin{pmatrix} V \\ \tilde{V} \end{pmatrix} &= \begin{pmatrix} \Lambda^2 + \nu V^T X^* X V & \nu V^T X^T U_1 \Lambda_1 V_1^T / \sqrt{n} \\ \nu V_1 \Lambda_1 U_1^T X V / \sqrt{n} & \nu V_1 \Lambda_1^2 V_1^T \end{pmatrix} \\ &= QMQ^T, \text{ where } Q := \begin{pmatrix} I_r & V^T X^T U_1 \Lambda_1^{-1} V_1^T / \sqrt{n} \\ 0 & I_{p-r} \end{pmatrix}, M := \begin{pmatrix} B & 0 \\ 0 & \nu V_1 \Lambda_1^2 V_1^T \end{pmatrix} \end{aligned}$$

We can directly verify that  $(QMQ^T)^\dagger = (Q^T)^{-1} M^\dagger Q^{-1}$ , thus

$$DA^\dagger = D \begin{pmatrix} V \\ \tilde{V} \end{pmatrix} \left( \begin{pmatrix} V^T \\ \tilde{V}^T \end{pmatrix} A \begin{pmatrix} V \\ \tilde{V} \end{pmatrix} \right)^\dagger \begin{pmatrix} V^T \\ \tilde{V}^T \end{pmatrix} = (U\Lambda, 0) (Q^T)^{-1} M^\dagger Q^{-1} \begin{pmatrix} V^T \\ \tilde{V}^T \end{pmatrix},$$

which comes to be the right hand side of (A.7). Now it is easy to verify (A.8).  $\square$

**Lemma 5.** If

$$K = \begin{pmatrix} P & Q \\ Q^T & R \end{pmatrix} \succeq 0,$$

then

$$(u^T, v^T) \begin{pmatrix} P & Q \\ Q^T & R \end{pmatrix} \begin{pmatrix} u \\ v \end{pmatrix} \geq \max(u^T (P - QR^\dagger Q^T) u, v^T (R - Q^T P^\dagger Q) v). \quad (\text{A.9})$$

Moreover, for  $0 \leq \lambda \leq 1$ , the following two statements are equivalent:

$$P - QR^\dagger Q^T \succeq \lambda P, \quad (\text{A.10})$$

$$R - Q^T P^\dagger Q \succeq \lambda R. \quad (\text{A.11})$$

And if (A.10) and (A.11) hold, then by (A.9) we have

$$\begin{aligned} (u^T, v^T) \begin{pmatrix} P & Q \\ Q^T & R \end{pmatrix} \begin{pmatrix} u \\ v \end{pmatrix} &\geq \max(\lambda u^T P u, \lambda v^T R v) \\ &\geq \lambda \max(\lambda_{\min}(P) \|u\|_2^2, \lambda_{\min}(R) \|v\|_2^2) \geq \frac{\lambda}{1/\lambda_{\min}(P) + 1/\lambda_{\min}(R)} \left\| \begin{pmatrix} u \\ v \end{pmatrix} \right\|_2^2. \end{aligned} \quad (\text{A.12})$$

*Proof.* Theorem 1.19 in [Zha06] tells that  $PP^\dagger Q = Q$ , so it is easy to verify

$$K = \begin{pmatrix} I & 0 \\ Q^T P^\dagger & I \end{pmatrix} \begin{pmatrix} P & 0 \\ 0 & R - Q^T P^\dagger Q \end{pmatrix} \begin{pmatrix} I & P^\dagger Q \\ 0 & I \end{pmatrix}.$$

Thus

$$(u^T, v^T) K \begin{pmatrix} u \\ v \end{pmatrix} = \begin{pmatrix} u + P^\dagger R v \\ v \end{pmatrix}^T \begin{pmatrix} P & 0 \\ 0 & R - Q^T P^\dagger Q \end{pmatrix} \begin{pmatrix} u + P^\dagger R v \\ v \end{pmatrix} \geq v^T (R - Q^T P^\dagger Q) v.$$

Similarly we can obtain another inequality.

If (A.10) holds, then

$$\begin{aligned} P^{\dagger 1/2} Q R^{\dagger 1/2} \cdot R^{\dagger 1/2} Q^T P^{\dagger 1/2} &\preceq (1 - \lambda) P^{\dagger 1/2} P P^{\dagger 1/2} \preceq (1 - \lambda) I \\ \implies R^{\dagger 1/2} Q^T P^{\dagger 1/2} \cdot P^{\dagger 1/2} Q R^{\dagger 1/2} &\preceq (1 - \lambda) I \implies R^{1/2} R^{\dagger 1/2} Q^T P^\dagger Q R^{1/2} \preceq (1 - \lambda) R. \end{aligned}$$

By Theorem 1.19 in [Zha06] we have  $Q R^{\dagger 1/2} R^{1/2} = Q$ , thus  $Q^T P^\dagger Q \preceq (1 - \lambda) R$ , i.e. (A.11) holds. Similarly (A.11) implies (A.10).  $\square$

**Lemma 6.** *Adopt the notation from (2.9) to (2.11). If (2.2) holds, then (2.6) holds for  $\lambda_\Sigma = \lambda_H$ . On the other hand, if (2.6) holds, then (2.2) holds for*

$$\lambda_H = \frac{\lambda_\Sigma \lambda_D^2}{\lambda_D^2 + (\nu \Lambda_X^2 + \Lambda_D^2) (1/(\lambda_D^2) + 1/(\nu \lambda_1^2))}.$$

*Proof.* If (2.2) holds, note that

$$H_{(\beta, S), (\beta, S)} = Q M Q^T, \text{ where } Q := \begin{pmatrix} I_p & 0 \\ -D_S A^\dagger & I_s \end{pmatrix}, M := \begin{pmatrix} A/\nu & 0 \\ 0 & \Sigma_{S, S} \end{pmatrix}. \quad (\text{A.13})$$

So the left hand side of (2.2) can be written as

$$\begin{pmatrix} \beta - A^\dagger D_S^T \gamma_S \\ \gamma_S \end{pmatrix}^T \begin{pmatrix} A/\nu & 0 \\ 0 & \Sigma_{S, S} \end{pmatrix} \begin{pmatrix} \beta - A^\dagger D_S^T \gamma_S \\ \gamma_S \end{pmatrix}.$$

Taking  $\beta = A^\dagger D_S^T \gamma_S \in L$ , it becomes  $\gamma_S^T \Sigma_{S, S} \gamma_S$ , which is not less than  $\lambda_H \|\gamma_S\|_2^2$  for any  $\gamma_S \in \mathbb{R}^s$ . So  $\Sigma_{S, S} \succeq \lambda_H I$ .

On the other hand, if (2.6) holds, since

$$H_{S, S} - H_{S, \beta} H_{\beta, \beta}^\dagger H_{\beta, S} = \Sigma_{S, S} \succeq \lambda_\Sigma I = \lambda_\Sigma \nu \cdot H_{S, S}, \quad (\text{A.14})$$

by (A.12) we have

$$(\beta^T, \gamma_S^T) \cdot H_{(\beta, S), (\beta, S)} \cdot \begin{pmatrix} \beta \\ \gamma_S \end{pmatrix} \geq \lambda_\Sigma \nu \cdot \gamma_S^T H_{S, S} \gamma_S = \lambda_\Sigma \|\gamma_S\|_2^2.$$

By Lemma 3, let  $\beta = V\delta + \tilde{V}V_1\xi$ . By Lemma 5 and (A.14), we know  $H_{\beta, \beta} - H_{\beta, S} H_{S, S}^\dagger H_{S, \beta} \succeq \lambda_\Sigma \nu \cdot H_{\beta, \beta}$ , and

$$\begin{aligned} &(\beta^T, \gamma_S^T) \cdot H_{(\beta, S), (\beta, S)} \cdot \begin{pmatrix} \beta \\ \gamma_S \end{pmatrix} \geq \lambda_\Sigma \nu \cdot \beta^T H_{\beta, \beta} \beta \\ &= \lambda_\Sigma (\delta^T, \xi^T) \begin{pmatrix} \Lambda^2 + \nu V^T X^* X V & \nu V^T X^* X \tilde{V} V_1 \\ \nu V_1^T \tilde{V}^T X^* X V & \nu V_1^T \tilde{V}^T X^* X \tilde{V} V_1 \end{pmatrix} \begin{pmatrix} \delta \\ \xi \end{pmatrix} := \lambda_\Sigma (\delta^T, \xi^T) \begin{pmatrix} P & Q \\ Q^T & R \end{pmatrix} \begin{pmatrix} \delta \\ \xi \end{pmatrix}. \end{aligned}$$

We have

$$P - Q R^\dagger Q^T = \Lambda^2 + \nu V^T X^* (I - U_1 U_1^T) X V \succeq \lambda_D^2 I \succeq \frac{\lambda_D^2}{\nu \Lambda_X^2 + \Lambda_D^2} P.$$

Thus by (A.12),

$$\begin{aligned} (\delta^T, \xi^T) \begin{pmatrix} P & Q \\ Q^T & R \end{pmatrix} \begin{pmatrix} \delta \\ \xi \end{pmatrix} &\geq \frac{\lambda_D^2}{\nu \Lambda_X^2 + \Lambda_D^2} \cdot \frac{1}{1/\lambda_{\min}(P) + 1/\lambda_{\min}(R)} (\|\delta\|_2^2 + \|\xi\|_2^2) \\ &\geq \frac{\lambda_D^2}{(\nu \Lambda_X^2 + \Lambda_D^2) (1/\lambda_D^2 + 1/(\nu \lambda_1^2))} \|\beta\|_2^2. \end{aligned}$$

Concluding the results above, we get

$$\begin{aligned} \left\| \begin{pmatrix} \beta \\ \gamma_S \end{pmatrix} \right\|_2^2 &= \|\beta\|_2^2 + \|\gamma_S\|_2^2 \\ &\leq \frac{1}{\lambda_\Sigma} \left( 1 + \frac{(\nu\Lambda_X^2 + \Lambda_D^2)(1/\lambda_D^2 + 1/(\nu\lambda_1^2))}{\lambda_D^2} \right) \cdot (\beta^T, \gamma_S^T) \cdot H_{(\beta,S),(\beta,S)} \cdot \begin{pmatrix} \beta \\ \gamma_S \end{pmatrix}. \end{aligned}$$

Thus (2.2) holds for

$$\lambda_H = \frac{\lambda_\Sigma \lambda_D^2}{\lambda_D^2 + (\nu\Lambda_X^2 + \Lambda_D^2)(1/(\lambda_D^2) + 1/(\nu\lambda_1^2))}.$$

□

**Lemma 7.** When  $\Sigma_{S,S} \succ 0$ , we have

$$H_{S^c,(\beta,S)} H_{(\beta,S),(\beta,S)}^\dagger = \left( -D_{S^c} A^\dagger + \Sigma_{S^c,S} \Sigma_{S,S}^{-1} D_S A^\dagger, \Sigma_{S^c,S} \Sigma_{S,S}^{-1} \right). \quad (\text{A.15})$$

Consequently, for any  $\rho \in [-1, 1]^s$ , we have

$$\sup_{\rho \in [-1, 1]^s} \left\| H_{S^c,(\beta,S)} H_{(\beta,S),(\beta,S)}^\dagger \cdot \begin{pmatrix} 0 \\ \rho \end{pmatrix} \right\|_\infty = \sup_{\rho \in [-1, 1]^s} \left\| \Sigma_{S^c,S} \Sigma_{S,S}^{-1} \cdot \rho \right\|_\infty = \left\| \Sigma_{S^c,S} \Sigma_{S,S}^{-1} \right\|_\infty.$$

*Proof.* By (A.13), we know

$$\begin{aligned} \text{rank}(H_{(\beta,S),(\beta,S)}) &= \text{rank} \left( \begin{pmatrix} A/\nu & 0 \\ 0 & \Sigma_{S,S} \end{pmatrix} \right) \\ &= \text{rank}(A) + \text{rank}(\Sigma_{S,S}) = \text{rank}(H_{\beta,\beta}) + \text{rank}(H_{S,S}). \end{aligned}$$

Then by Theorem 1.21 in [Zha06], we have that

$$H_{(\beta,S),(\beta,S)}^\dagger = \begin{pmatrix} \nu A^\dagger + A^\dagger D_S^T \Sigma_{S,S}^{-1} D_S A^\dagger & A^\dagger D_S^T \Sigma_{S,S}^{-1} \\ \Sigma_{S,S}^{-1} D_S A^\dagger & \Sigma_{S,S}^{-1} \end{pmatrix}.$$

By  $H_{S^c,(\beta,S)} = (-D_{S^c}/\nu, 0)$  and  $-D_{S^c} A^\dagger D_S/\nu = \Sigma_{S^c,S}$ , we are done. □

## B Proof of Theorem 1

*Proof of Theorem 1.* By definition, we have  $\text{IC}_0 \geq \|\Omega^S \text{sign}(D_S \beta^*)\|_\infty \geq \text{IC}_1$ . Now we prove  $\text{IRR}(0)$  exists and  $\text{IRR}(0) = \text{IC}_0$ . Let  $M := \Lambda^{-1} V^T X^* (I - U_1 U_1^T) X V \Lambda^{-1}$ . When  $\nu$  is small, by (A.8),

$$\begin{aligned} \nu \Sigma &= I - U \Lambda B^{-1} \Lambda U^T = I - U (I + \nu M)^{-1} U^T \\ &= I - U (I - \nu M + O(\nu^2)) U^T = I - U U^T + \nu U M U^T + O(\nu^2) \\ \implies \nu \Sigma_{S^c,S} &= -U_{S^c} U_S^T + \nu U_{S^c} M U_S^T + O(\nu^2), \quad \nu \Sigma_{S,S} = I - U_S U_S^T + \nu U_S M U_S^T + O(\nu^2). \end{aligned}$$

Let  $F := I - U_S U_S^T$  and  $F = U' \Lambda' U'^T$  be the “compact” eigendecomposition of  $F$  ( $\Lambda' \succ 0$ ). Let  $G := U_S M U_S^T$ . Suppose  $(U', \tilde{U}')$  is an orthogonal square matrix, and

$$K = \begin{pmatrix} K_1 & K_2 \\ K_2^T & K_3 \end{pmatrix} := \begin{pmatrix} U'^T \\ \tilde{U}'^T \end{pmatrix} G \begin{pmatrix} U' \\ \tilde{U}' \end{pmatrix}.$$

By  $F + \nu G \succ 0$ , we have  $K_3 \succ 0$ . Now

$$F + \nu G = \begin{pmatrix} U' \\ \tilde{U}' \end{pmatrix} \begin{pmatrix} \Lambda' + \nu K_1 & \nu K_2 \\ \nu K_2^T & \nu K_3 \end{pmatrix} \begin{pmatrix} U'^T \\ \tilde{U}'^T \end{pmatrix}.$$

Define  $Q_\nu = K_3 - \nu K_2^T (\Lambda' + \nu K_1)^{-1} K_2$ ,  $R_\nu = K_2^T (\Lambda' + \nu K_1)^{-1}$ , and we can calculate

$$(F + \nu G)^{-1} = \begin{pmatrix} U' \\ \tilde{U}' \end{pmatrix} \begin{pmatrix} (\Lambda' + \nu K_1)^{-1} + \nu R_\nu^T Q_\nu^{-1} R_\nu & -R_\nu^T Q_\nu^{-1} \\ -Q_\nu^{-1} R_\nu & Q_\nu / \nu \end{pmatrix} \begin{pmatrix} U'^T \\ \tilde{U}'^T \end{pmatrix}.$$

Note that  $Q_\nu \rightarrow K_3$ ,  $R_\nu \rightarrow K_2^T \Lambda'^{-1}$ , and note that

$$\begin{aligned} U_{S^c}^T U_{S^c} U_S^T \tilde{U}' &= (I - U_S^T U_S) U_S^T \tilde{U}' = U_S^T (I - U_S U_S^T) \tilde{U}' = U_S^T U' \Lambda' \cdot U'^T \tilde{U}' = 0 \\ &\implies \left( U_{S^c} U_S^T \tilde{U}' \right)^T U_{S^c} U_S^T \tilde{U}' = 0 \implies U_{S^c} U_S^T \tilde{U}' = 0. \quad (\text{B.1}) \end{aligned}$$

Combining it with the representation of  $(F + \nu G)^{-1}$ ,

$$\begin{aligned} -U_{S^c} U_S^T \Sigma_{S,S}^{-1} &\doteq U_{S^c} U_S^T (F + \nu G)^{-1} \\ &= -\left( U_{S^c} U_S^T U', 0 \right) \begin{pmatrix} (\Lambda' + \nu K_1)^{-1} + \nu R_\nu^T Q_\nu^{-1} R_\nu & -R_\nu^T Q_\nu^{-1} \\ -Q_\nu^{-1} R_\nu & \star \end{pmatrix} \begin{pmatrix} U'^T \\ \tilde{U}'^T \end{pmatrix} \\ &\rightarrow \left( -U_{S^c} U_S^T U' \Lambda'^{-1}, U_{S^c} U_S^T U' \Lambda'^{-1} K_2 K_3^{-1} \right) \begin{pmatrix} U'^T \\ \tilde{U}'^T \end{pmatrix} = -U_{S^c} U_S^T U' \Lambda'^{-1} \left( U'^T - K_2 K_3^{-1} \tilde{U}'^T \right). \end{aligned}$$

Besides,

$$\nu U_{S^c} M U_S^T \Sigma_{S,S}^{-1} \doteq U_{S^c} M U_S^T \cdot \nu (F + \nu G)^{-1} \rightarrow U_{S^c} M U_S^T \tilde{U}' K_3^{-1} \tilde{U}'^T.$$

So when  $\nu \rightarrow 0$ ,

$$\begin{aligned} \Sigma_{S^c,S} \Sigma_{S,S}^{-1} &\rightarrow -U_{S^c} U_S^T U' \Lambda'^{-1} \left( U'^T - K_2 K_3^{-1} \tilde{U}'^T \right) + U_{S^c} M U_S^T \tilde{U}' K_3^{-1} \tilde{U}'^T \\ &= -U_{S^c} U_S^T U' \Lambda'^{-1} U'^T + U_{S^c} \left( U_S^T U' \Lambda'^{-1} U'^T U_S + I \right) M U_S^T \tilde{U}' K_3^{-1} \tilde{U}'^T \\ &= -D_{S^c} V \Lambda^{-1} U_S^T U' \Lambda'^{-1} U'^T + D_{S^c} V \Lambda^{-1} \left( I + U_S^T U' \Lambda'^{-1} U'^T U_S \right) M U_S^T \tilde{U}' K_3^{-1} \tilde{U}'^T. \end{aligned}$$

The infinity norm of the right hand side is  $\text{IRR}(0)$ . On the other hand,

$$\text{IC}_0 = \left\| D_{S^c} \left( D_{S^c}^T D_{S^c} \right)^\dagger \left( X^* X W \left( W^T X^* X W \right)^\dagger W^T - I \right) D_S^T \right\|_\infty.$$

In order to prove  $\text{IRR}(0) = \text{IC}_0$ , it suffices to show

$$\begin{aligned} \left( X^* X W \left( W^T X^* X W \right)^\dagger W^T - I \right) D_S^T &= -D_{S^c}^T D_{S^c} V \Lambda^{-1} U_S^T U' \Lambda'^{-1} U'^T \\ &\quad + D_{S^c}^T D_{S^c} V \Lambda^{-1} \left( I + U_S^T U' \Lambda'^{-1} U'^T U_S \right) M U_S^T \tilde{U}' K_3^{-1} \tilde{U}'^T. \end{aligned}$$

The first term of the right hand side is

$$\begin{aligned} -V \Lambda U_{S^c}^T U_{S^c} U_S^T U' \Lambda'^{-1} U'^T &= -V \Lambda \left( I - U_S^T U_S \right) U_S^T U' \Lambda'^{-1} U'^T \\ &= -V \Lambda U_S^T \left( I - U_S U_S^T \right) U' \Lambda'^{-1} U'^T = -V \Lambda U_S^T U' \Lambda' U'^T U' \Lambda'^{-1} U'^T = -D_S^T U' U'^T, \end{aligned}$$

while by the fact that

$$\begin{aligned} \left( I - U_S^T U_S \right) \left( I + U_S^T U' \Lambda'^{-1} U'^T U_S \right) &= I - U_S^T U_S + U_S^T U' \Lambda'^{-1} U'^T U_S - U_S^T U_S U_S^T U' \Lambda'^{-1} U'^T U_S \\ &= I - U_S^T U_S + U_S^T \left( I - U_S U_S^T \right) U' \Lambda'^{-1} U'^T U_S \\ &= I - U_S^T U_S + U_S^T U' U'^T U_S = I - U_S^T \tilde{U}' \tilde{U}'^T U_S, \end{aligned}$$

the second term becomes

$$\begin{aligned} V \Lambda U_{S^c}^T U_{S^c} \left( I + U_S^T U' \Lambda'^{-1} U'^T U_S \right) M U_S^T \tilde{U}' K_3^{-1} \tilde{U}'^T &= V \Lambda \left( I - U_S^T U_S \right) \left( I + U_S^T U' \Lambda'^{-1} U'^T U_S \right) M U_S^T \tilde{U}' K_3^{-1} \tilde{U}'^T \\ &= V \Lambda \left( I - U_S^T \tilde{U}' \tilde{U}'^T U_S \right) M U_S^T \tilde{U}' K_3^{-1} \tilde{U}'^T \\ &= V \Lambda M U_S^T \tilde{U}' K_3^{-1} \tilde{U}'^T - V \Lambda U_S^T \tilde{U}' \cdot \tilde{U}'^T U_S M U_S^T \tilde{U}' \cdot K_3^{-1} \tilde{U}'^T \\ &= X^* \left( I - U_1 U_1^T \right) X V \Lambda^{-1} U_S^T \tilde{U}' K_3^{-1} \tilde{U}'^T - D_S^T \tilde{U}' \cdot K_3 \cdot K_3^{-1} \tilde{U}'^T \\ &= X^* \left( I - U_1 U_1^T \right) X V \Lambda^{-1} U_S^T \tilde{U}' K_3^{-1} \tilde{U}'^T - D_S^T \tilde{U}' \tilde{U}'^T. \end{aligned}$$

So it suffices to show

$$X^* XW (W^T X^* XW)^\dagger W^T D_S^T = X^* (I - U_1 U_1^T) X V \Lambda^{-1} U_S^T \tilde{U}' K_3^{-1} \tilde{U}'^T,$$

which is equivalent to

$$X^* (XWW^T X^*)^\dagger XWW^T D_S^T = X^* (I - U_1 U_1^T) X V \Lambda^{-1} U_S^T \tilde{U}' K_3^{-1} \tilde{U}'^T. \quad (\text{B.2})$$

First we prove

$$\ker(U_{S^c}) = \text{Im}(U_S^T \tilde{U}'). \quad (\text{B.3})$$

In fact, by (B.1) we have  $\text{Im}(U_S^T \tilde{U}') \subseteq \ker(U_{S^c})$ . For any  $\zeta \in \ker(U_{S^c})$ , we have  $(I - U_S^T U_S) \zeta = U_{S^c}^T U_{S^c} \zeta = 0$ . Let

$$\zeta = U_S^T \zeta_1 + \zeta_2, \quad \zeta_2 \in \ker(U_S),$$

then

$$0 = (I - U_S^T U_S)(U_S^T \zeta_1 + \zeta_2) = \zeta_2 + (I - U_S^T U_S) U_S^T \zeta_1 = \zeta_2 + U_S^T (I - U_S U_S^T) \zeta_1,$$

which implies  $\zeta_2 \in \text{Im}(U_S^T)$ . But  $\zeta_2 \in \ker(U_S)$ , then  $\zeta_2 = 0$ , and  $0 = (I - U_S^T U_S) U_S^T \zeta_1 = U_S^T (I - U_S U_S^T) \zeta_1 = U_S^T U' \Lambda' U'^T \zeta_1$ . Assume that  $\zeta_1 = U' \zeta_3 + \tilde{U}' \tilde{\zeta}_3$ , then  $U_S^T U' \Lambda' \zeta_3 = 0$ . Thus

$$\begin{aligned} 0 &= U_S U_S^T U' \Lambda' \zeta_3 = (I - U' \Lambda' U'^T) U' \Lambda' \zeta_3 = U' \Lambda' (I - \Lambda') \zeta_3 \implies (I - \Lambda') \zeta_3 = 0 \\ &\implies U_S U_S^T U' \zeta_3 = U' (I - \Lambda') \zeta_3 = 0 \implies (U_S^T U' \zeta_3)^T U_S^T U' \zeta_3 = 0 \implies U_S^T U' \zeta_3 = 0 \\ &\implies \beta = U_S^T \zeta_1 = U_S^T U' \zeta_3 + U_S^T \tilde{U}' \tilde{\zeta}_3 = U_S^T \tilde{U}' \tilde{\zeta}_3 \in \text{Im}(U_S^T \tilde{U}'). \end{aligned}$$

So (B.3) holds. Now for any  $\beta \in \mathbb{R}^p$ , let  $\beta = V\delta + \tilde{V}\tilde{\delta}$ , then  $\beta \in \ker(D_{S^c})$  if and only if  $U_{S^c} \Lambda \delta = 0$ , which means  $\delta \in \Lambda^{-1} \ker(U_{S^c}) = \text{Im}(\Lambda^{-1} U_S^T \tilde{U}')$ . So

$$\ker(D_{S^c}) = \text{Im}(J) + \text{Im}(\tilde{V}), \quad \text{where } J := V \Lambda^{-1} U_S^T \tilde{U}'.$$

Since  $\tilde{V}^T V = 0$ , the linear subspaces spanned by  $J$  and  $\tilde{V}$  are orthogonal, and we have

$$WW^T = J(J^T J)^\dagger J^T + \tilde{V} \tilde{V}^T.$$

Noting  $\tilde{V}^T V = 0$ ,  $\tilde{V}^T X^*(I - U_1 U_1^T) = 0$ , we have

$$\begin{aligned} &X^* (XWW^T X^*)^\dagger XWW^T D_S^T \tilde{U}' \tilde{U}'^T K_3 \\ &= X^* (XWW^T X^*)^\dagger XJ (J^T J)^\dagger J^T V \Lambda U_S^T \tilde{U}' \tilde{U}'^T K_3 \\ &= X^* (XWW^T X^*)^\dagger XJ (J^T J)^\dagger \cdot \tilde{U}'^T U_S U_S^T \tilde{U}' \cdot \tilde{U}'^T U_S M U_S^T \tilde{U}' \\ &= X^* (XWW^T X^*)^\dagger XJ (J^T J)^\dagger \cdot \tilde{U}'^T U_S M U_S^T \tilde{U}' \\ &= X^* (XWW^T X^*)^\dagger XJ (J^T J)^\dagger J^T X^* (I - U_1 U_1^T) X V \Lambda^{-1} U_S^T \tilde{U}' \\ &= X^* (XWW^T X^*)^\dagger (XWW^T X^*) (I - U_1 U_1^T) XJ. \end{aligned}$$

Since  $(XWW^T X^*)^\dagger (XWW^T X^*)$  is the projection matrix onto the linear subspace  $\text{Im}(XW) = \text{Im}(X\tilde{V}) + \text{Im}(XJ) = \text{Im}(U_1) + \text{Im}(XJ)$ , and  $(I - U_1 U_1^T) XJ = XJ - U_1 \cdot U_1^T XJ$  lies in this subspace, the last term above becomes  $X^* (I - U_1 U_1^T) XJ$ . Therefore, we get

$$\begin{aligned} &X^* (XWW^T X^*)^\dagger XWW^T D_S^T \tilde{U}' K_3 = X^* (I - U_1 U_1^T) XJ \\ &\iff X^* (XWW^T X^*)^\dagger XWW^T D_S^T \tilde{U}' = X^* (I - U_1 U_1^T) X V \Lambda^{-1} U_S^T \tilde{U}' K_3^{-1}. \end{aligned}$$

Now to prove (B.2), it suffices to show

$$\begin{aligned} &X^* (XWW^T X^*)^\dagger XWW^T D_S^T (I - \tilde{U}' \tilde{U}'^T) = 0 \iff WW^T D_S^T U' U'^T = 0 \\ &\iff J (J^T J)^\dagger J^T D_S^T U' = 0 \iff J^T D_S^T U' = 0 \iff \tilde{U}'^T U_S \Lambda^{-1} V^T \cdot V \Lambda U_S^T U' = 0 \\ &\iff \tilde{U}'^T U_S U_S^T U' = 0 \iff \tilde{U}'^T (I - U' \Lambda' U'^T) U' = 0, \end{aligned}$$

which is surely true since  $\tilde{U}''^T U' = 0$ . Then  $\text{IRR}(0) = \text{IC}_0$  is proved.

Now we turn to  $\text{IRR}(\infty)$ . Let  $M = U'' \Lambda'' U''^T$  be the compact eigendecomposition of  $M$ , and  $(U'', \tilde{U}'')$  is an orthogonal square matrix. Then

$$\begin{aligned} \nu \Sigma &= I - U (I + \nu M)^{-1} U^T \\ &= I - U (U'', \tilde{U}'') \left( \begin{pmatrix} U''^T \\ \tilde{U}''^T \end{pmatrix} (I + \nu M) \begin{pmatrix} U'' \\ \tilde{U}'' \end{pmatrix} \right)^{-1} \begin{pmatrix} U''^T \\ \tilde{U}''^T \end{pmatrix} U^T \\ &= I - U (U'', \tilde{U}'') \begin{pmatrix} I + \nu \Lambda'' & 0 \\ 0 & I \end{pmatrix}^{-1} \begin{pmatrix} U''^T \\ \tilde{U}''^T \end{pmatrix} U^T \\ &= I - U U'' (I + \nu \Lambda'')^{-1} U''^T U^T - U \tilde{U}'' \tilde{U}''^T U^T \rightarrow I - U \tilde{U}'' \tilde{U}''^T U^T \end{aligned}$$

when  $\nu \rightarrow +\infty$ . Besides,  $\nu \Sigma_{S,S} \rightarrow I - U_S \tilde{U}'' \tilde{U}''^T U_S^T$ , and this limit  $\succeq \nu \Sigma_{S,S} \succ 0$  for any  $\nu > 0$ . Thus  $\Sigma_{S^c,S} \Sigma_{S,S}^{-1}$  has limit when  $\nu \rightarrow +\infty$ .

Now we study when  $\text{IRR}(\infty) = 0$ . The underlying existence of  $\Sigma_{S,S}^{-1}$  requires  $\Sigma_{S,S} \succ 0$ , which is equivalent to  $\ker(D_{S^c}) \cap \ker(X) \subseteq \ker(D_S)$  by Lemma 2. Let

$$D_S^T = X^T C_1 + D_{S^c}^T C_2, \text{ which implies } U_S^T = \Lambda^{-1} V^T X^T C_1 + U_{S^c}^T C_2.$$

Then  $0 = \tilde{V}^T D_S^T = \tilde{V}^T X^T C_1 + 0 = \sqrt{n} V_1 \Lambda_1 U_1^T C_1$ , which implies  $U_1^T C_1 = 0$ . So for  $N = \Lambda^{-1} V^T X^T (I - U_1 U_1^T) / \sqrt{n}$ , we have

$$N C_1 = \Lambda^{-1} V^T X^T C_1 / \sqrt{n}.$$

Then  $\text{IRR}(\infty) = 0 \iff -U_{S^c} \tilde{U}'' \tilde{U}''^T U_S^T = 0 \iff -U_{S^c} (I - M M^\dagger) U_S^T = 0$ . By  $M = N N^T$ , the equation is further equivalent to

$$\begin{aligned} -U_{S^c} (I - N N^\dagger) U_S^T &= 0 \iff -U_{S^c} (I - N N^\dagger) (\Lambda^{-1} V^T X^T C_1 + U_{S^c}^T C_2) = 0 \\ &\iff -U_{S^c} (I - N N^\dagger) (\sqrt{n} N C_1 + U_{S^c}^T C_2) = 0 \\ &\iff -U_{S^c} (I - N N^\dagger) U_{S^c}^T C_2 = 0 \iff C_2^T U_{S^c} (I - N N^\dagger) \cdot (I - N N^\dagger) U_{S^c}^T C_2 = 0 \\ &\iff (I - N N^\dagger) U_{S^c}^T C_2 = 0 \iff \text{Im}(U_{S^c}^T C_2) \subseteq \text{Im}(N). \end{aligned}$$

It suffices to show that the last property holds if and only if  $\ker(X) \subseteq \ker(D_S)$  or, equivalently,  $\text{Im}(D_S^T) \subseteq \text{Im}(X^T)$ . In fact, if  $\text{Im}(D_S^T) \subseteq \text{Im}(X^T)$ , then  $C_2$  can be set 0 in the beginning, and  $\text{Im}(U_{S^c}^T C_2) = \text{Im}(0) \subseteq \text{Im}(N)$ . If  $\text{Im}(U_{S^c}^T C_2) \subseteq \text{Im}(N)$ , let  $U_{S^c}^T C_2 = N C_3$ , then

$$\begin{aligned} D_{S^c}^T C_2 &= V \Lambda U_{S^c}^T C_2 = V V^T X^T (I - U_1 U_1^T) C_3 / \sqrt{n} \\ &= (V V^T + \tilde{V} \tilde{V}^T) X^T (I - U_1 U_1^T) C_3 / \sqrt{n} = X^T (I - U_1 U_1^T) C_3 / \sqrt{n}, \end{aligned}$$

and hence  $D_S^T = X^T C_1 + D_{S^c}^T C_2 = X^T (C_1 + (I - U_1 U_1^T) C_3 / \sqrt{n})$ , which implies  $\text{Im}(D_S^T) \subseteq \text{Im}(X^T)$ . We have finished the proof of that  $\text{IRR}(\infty) = 0$  if and only if  $\ker(X) \subseteq \ker(D_S)$ .  $\square$

## C Split Linearized Inverse Scale Space (Split LBISS) as the Limit Dynamics of Split LBI

Now we focus on a differential inclusion called *Split Linearized Bregman Inverse Scale Space (Split LBISS)*, the limit dynamics of Split LBI when the step size  $\alpha \rightarrow 0$ . This dynamics helps us understand the behavior of Split LBI, and the proof on sign consistency as well as  $\ell_2$  consistency of Split LBISS can be rewritten into a discrete version then applied to Split LBI with slight modifications.

First, noting that

$$\rho \in \partial \|\gamma\|_1, z = \rho + \gamma / \kappa \iff \gamma = \kappa \mathcal{S}(z, 1), \rho = z - \mathcal{S}(z, 1), \quad (\text{C.1})$$

we have an equivalent form of Split LBI as follows.

$$\beta_{k+1}/\kappa = \beta_k/\kappa - \alpha \nabla_{\beta} \ell(\beta_k, \gamma_k), \quad (\text{C.2a})$$

$$\rho_{k+1} + \gamma_{k+1}/\kappa = \rho_k + \gamma_k/\kappa - \alpha \nabla_{\gamma} \ell(\beta_k, \gamma_k), \quad (\text{C.2b})$$

$$\rho_k \in \partial \|\gamma_k\|_1, \quad (\text{C.2c})$$

where  $\rho_0 = \gamma_0 = 0 \in \mathbb{R}^m$ ,  $\beta_0 = 0 \in \mathbb{R}^p$ . By letting  $\rho(k\alpha) = \rho_k$ ,  $\gamma(k\alpha) = \gamma_k$ ,  $\beta(k\alpha) = \beta_k$  and  $\alpha \rightarrow 0$ , the iteration above can be viewed as a forward Euler discretization to the following inclusion called *Split Linearized Bregman Inverse Scale Space (Split LBISS)*.

$$\dot{\beta}(t)/\kappa = -\nabla_{\beta} \ell(\beta(t), \gamma(t)) = -X^*(X\beta(t) - y) - D^T(D\beta(t) - \gamma(t))/\nu, \quad (\text{C.3a})$$

$$\dot{\rho}(t) + \dot{\gamma}(t)/\kappa = -\nabla_{\gamma} \ell(\beta(t), \gamma(t)) = -(\gamma(t) - D\beta(t))/\nu, \quad (\text{C.3b})$$

$$\rho(t) \in \partial \|\gamma(t)\|_1, \quad (\text{C.3c})$$

where  $\rho(t), \beta(t), \gamma(t)$  are right continuously differentiable, with  $\dot{\rho}(t), \dot{\beta}(t), \dot{\gamma}(t)$  denoting the right derivatives in  $t$  of  $\rho(t), \beta(t), \gamma(t)$  respectively, and  $\rho(0) = \gamma(0) = 0 \in \mathbb{R}^m$ ,  $\beta(0) = 0 \in \mathbb{R}^p$ .

The following inclusion called *Split Inverse Scale Space (Split ISS)* can be viewed as the limit of Split LBISS when  $\kappa \rightarrow +\infty$ .

$$0 = -\nabla_{\beta} \ell(\beta(t), \gamma(t)) = -X^*(X\beta(t) - y) - D^T(D\beta(t) - \gamma(t))/\nu, \quad (\text{C.4a})$$

$$\dot{\rho}(t) = -\nabla_{\gamma} \ell(\beta(t), \gamma(t)) = -(\gamma(t) - D\beta(t))/\nu, \quad (\text{C.4b})$$

$$\rho(t) \in \partial \|\gamma(t)\|_1, \quad (\text{C.4c})$$

where  $\rho(t)$  is right continuously differentiable,  $\beta(t), \gamma(t)$  are right continuous, and  $\rho(0) = \gamma(0) = 0 \in \mathbb{R}^m$ ,  $\beta(0) = 0 \in \mathbb{R}^p$ . Besides, we require “ $\beta(t) \in L$ ”, since replacing  $\beta(t)$  with “the projection of  $\beta(t)$  onto  $L$ ” does not disturb (C.4a) to (C.4c). (C.4) coincides with the differential inclusion proposed in Chapter 8 of [Moe12], there the authors introduced it from another aspect.

The following propositions establish the solution existence and uniqueness of Split (LB)ISS, in almost the same way as [Osh+16].

**Proposition 1** (Solution existence and uniqueness for Split (LB)ISS).

1. As for Split ISS (C.4), assume that  $\rho(t)$  is right continuously differentiable and  $\beta(t), \gamma(t)$  is right continuous. Then a solution exists for  $t \geq 0$ , with piecewise linear  $\rho(t)$  and piecewise constant  $\beta(t), \gamma(t)$ . Besides,  $\rho(t)$  is unique. If additionally  $\Sigma_{S(t), S(t)} \succ 0$  for  $0 \leq t \leq \tau$ , where  $\Sigma$  is defined in (2.5) and  $S(t) := \text{supp}(\gamma(t))$ , then  $\beta(t), \gamma(t)$  are unique for  $0 \leq t \leq \tau$ .
2. As for Split LBISS (C.3), assume that  $\rho(t), \beta(t)$  are right continuously differentiable. Then a solution exists for  $t \geq 0$ .

*Proof of proposition 1.* For Split ISS, by (C.4a) and the fact that  $\beta(t) \in L = \text{Im}(X^T) + \text{Im}(D^T) = \text{Im}(A) = \text{Im}(A^\dagger)$ , we can solve  $\beta(t) = A^\dagger(\nu X^*y + D^T\gamma(t))$  which is determined by  $\gamma(t)$ . Plugging it into (C.4b) we have

$$\dot{\rho}(t) + \dot{\gamma}(t)/\kappa = -\Sigma\gamma(t) + DA^\dagger X^*y.$$

Taking  $M = I_{p+m} - (\sqrt{\nu/n}X^T, D^T)^\dagger(\sqrt{\nu/n}X^T, D^T)$  in Theorem 1.19 in [Zha06] leads to

$$DA^\dagger X^* = \Sigma\Sigma^\dagger (DA^\dagger X^*) = \Sigma^{1/2}\Sigma^{\dagger 1/2} (DAX^*).$$

The inclusion becomes

$$\dot{\rho}(t) + \dot{\gamma}(t)/\kappa = -\Sigma^{1/2} \left( \Sigma^{1/2}\gamma(t) - \Sigma^{\dagger 1/2} DA^\dagger X^*y \right),$$

which is a standard ISS (on  $\gamma(t)$ ) and has been sufficiently discussed in [Osh+16] (let  $X, y$  in that paper take  $\sqrt{n}\Sigma^{1/2}$  and  $\sqrt{n}\Sigma^{\dagger 1/2} DA^\dagger X^*y$  in this paper). Specifially, there exists a solution with piecewise linear  $\rho(t)$  and piecewise constant  $\beta(t), \gamma(t)$ . Besides,  $\rho(t)$  is unique. If additionally, when  $\Sigma_{S(t), S(t)} \succ 0$ , we have that  $\Sigma_{\cdot, S(t)}$  has full column rank, and  $\gamma(t)$  (hence  $\beta(t)$ ) is unique.

For Split LBISS, letting  $z(t) = \rho(t) + \gamma(t)/\kappa$  and noting (C.1), the Split LBISS (C.3) is equivalent to

$$\begin{pmatrix} \dot{\beta}(t) \\ \dot{z}(t) \end{pmatrix} = - \begin{pmatrix} -\kappa X^*(X\beta(t) - y) - \kappa D^T(D\beta(t) - \kappa S(z(t), 1))/\nu \\ -(\kappa S(z(t), 1) - D\beta(t))/\nu \end{pmatrix}.$$

The Picard-Lindelöf Theorem implies that this ODE has a unique solution  $(\beta(t), z(t))$ , so there exists a unique solution to the Split LBISS (C.3).  $\square$



Besides, for the loss function defined in (1.3), we have the following property.

**Proposition 2** (Non-increasing  $\ell$  along the solutions of Split (LB)ISS and LBI).

1. For a solution  $(\rho(t), \beta(t), \gamma(t))$  of Split ISS (C.4),  $\ell(\beta(t), \gamma(t))$  is non-increasing in  $t$ .
2. For a solution  $(\rho(t), \beta(t), \gamma(t))$  of Split LBISS (C.3),  $\ell(\beta(t), \gamma(t))$  is non-increasing in  $t$ .
3. For a solution  $(\rho_k, \beta_k, \gamma_k)$  of Split LBI (C.2),  $\ell(\beta_k, \gamma_k)$  is non-increasing in  $k$ , if

$$\kappa\alpha\|H\|_2 \leq 2. \quad (\text{C.5})$$

Moreover, one can prove  $\|H\|_2 \leq 2(1 + \nu\Lambda_X^2 + \Lambda_D^2)/\nu$ , so (C.5) holds if

$$\kappa\alpha \leq \nu/(1 + \nu\Lambda_X^2 + \Lambda_D^2). \quad (\text{C.6})$$

*Proof of proposition 2.* For Split ISS, one can easily imitates the technique in the proof of Theorem 2.1 in [Osh+16] to show that  $(\beta(t), \gamma(t))$  is the solution of the following optimization problem.

$$\begin{aligned} \min_{\beta, \gamma} \quad & \ell(\beta(t), \gamma(t)) \\ \text{subject to} \quad & \begin{cases} \gamma_j \geq 0, & \text{if } \rho_j(t) = 1, \\ \gamma_j \leq 0, & \text{if } \rho_j(t) = -1, \\ \gamma_j = 0, & \text{if } \rho_j(t) \in (-1, 1). \end{cases} \end{aligned} \quad (\text{C.7})$$

for any  $t > 0$ , due to the continuity of  $\rho(\cdot)$ , there is a small neighborhood of  $t$ , on which every  $\tau$  satisfies

$$\begin{cases} \rho_j(\tau) > -1 \text{ hence } \gamma_j(\tau) \geq 0, & \text{if } \rho_j(t) = 1, \\ \rho_j(\tau) < 1 \text{ hence } \gamma_j(\tau) \geq 0, & \text{if } \rho_j(t) = -1, \\ \rho_j(\tau) \in (-1, 1) \text{ hence } \gamma_j(\tau) = 0, & \text{if } \rho_j(t) \in (-1, 1). \end{cases}$$

That is to say,  $(\beta(\tau), \gamma(\tau))$  satisfies the constraints in (C.7), so the value of  $\ell(\beta(\tau), \gamma(\tau))$  is not less than  $\ell(\beta(t), \gamma(t))$ , namely the minimum of (C.7). This implies that any  $t \geq 0$  is a local minimal point of a right continuous function  $\ell(\beta(\cdot), \gamma(\cdot))$ . Then by standard techniques in mathematical analysis, we have that  $\ell(\beta(t), \gamma(t))$  is non-increasing.

For Split LBISS, by (C.3c), we have  $\dot{\gamma}_j(t) \cdot \dot{\rho}_j(t) \equiv 0$  for each  $j$ , so  $\ell$  is non-increasing since

$$\begin{aligned} \frac{d}{dt} \ell(\beta(t), \gamma(t)) &= \left\langle \begin{pmatrix} \dot{\beta}(t) \\ \dot{\gamma}(t) \end{pmatrix}, \begin{pmatrix} \nabla_{\beta} \ell(\beta(t), \gamma(t)) \\ \nabla_{\gamma} \ell(\beta(t), \gamma(t)) \end{pmatrix} \right\rangle \\ &= \left\langle \begin{pmatrix} \dot{\beta}(t) \\ \dot{\gamma}(t) \end{pmatrix}, \begin{pmatrix} -\dot{\beta}(t)/\kappa \\ -\dot{\rho}(t) - \dot{\gamma}(t)/\kappa \end{pmatrix} \right\rangle = \frac{1}{\kappa} \left\| \begin{pmatrix} \dot{\beta}(t) \\ \dot{\gamma}(t) \end{pmatrix} \right\|_2^2 \leq 0. \end{aligned}$$

For Split LBI, noting  $(\rho_{k+1} - \rho_k)(\gamma_{k+1} - \gamma_k) = \|\rho_{k+1}\|_1 - \langle \rho_{k+1}, \gamma_k \rangle + \|\gamma_{k+1}\|_1 - \langle \rho_k, \gamma_{k+1} \rangle \geq 0$ , we have

$$\begin{aligned} & -\alpha \nabla \ell(\beta_k, \gamma_k)^T \begin{pmatrix} \beta_{k+1} - \beta_k \\ \gamma_{k+1} - \gamma_k \end{pmatrix} \\ &= \left( \begin{pmatrix} 0 \\ \rho_{k+1} - \rho_k \end{pmatrix} + \frac{1}{\kappa} \begin{pmatrix} \beta_{k+1} - \beta_k \\ \gamma_{k+1} - \gamma_k \end{pmatrix} \right) \begin{pmatrix} \beta_{k+1} - \beta_k \\ \gamma_{k+1} - \gamma_k \end{pmatrix} \geq \frac{1}{\kappa} \left\| \begin{pmatrix} \beta_{k+1} - \beta_k \\ \gamma_{k+1} - \gamma_k \end{pmatrix} \right\|_2^2. \end{aligned}$$

By  $\kappa\alpha\|H\|_2 < 2$ , we have

$$\begin{aligned} & \ell(\beta_{k+1}, \gamma_{k+1}) - \ell(\beta_k, \gamma_k) \\ &= \nabla \ell(\beta_k, \gamma_k)^T \begin{pmatrix} \beta_{k+1} - \beta_k \\ \gamma_{k+1} - \gamma_k \end{pmatrix} + \frac{1}{2} (\beta_{k+1}^T - \beta_k^T, \gamma_{k+1}^T - \gamma_k^T) H \begin{pmatrix} \beta_{k+1} - \beta_k \\ \gamma_{k+1} - \gamma_k \end{pmatrix} \\ &\leq -\frac{1}{\kappa\alpha} \left\| \begin{pmatrix} \beta_{k+1} - \beta_k \\ \gamma_{k+1} - \gamma_k \end{pmatrix} \right\|_2^2 + \frac{\|H\|_2}{2} \cdot \left\| \begin{pmatrix} \beta_{k+1} - \beta_k \\ \gamma_{k+1} - \gamma_k \end{pmatrix} \right\|_2^2 \leq 0. \end{aligned}$$

Moreover, it is easy to verify that

$$\begin{aligned}
(\beta^T, \gamma^T) H \begin{pmatrix} \beta \\ \gamma \end{pmatrix} &= \frac{1}{n} \|X\beta\|_2^2 + \frac{1}{\nu} \|D\beta - \gamma\|_2^2 \leq \frac{2}{n} \|X\beta\|_2^2 + \frac{2}{\nu} \|D\beta\|_2^2 + 2\|\gamma\|_2^2 \\
&\leq \frac{2(1 + \nu\Lambda_X^2 + \Lambda_D^2)}{\nu} \left\| \begin{pmatrix} \beta \\ \gamma \end{pmatrix} \right\|_2^2 \left( \begin{pmatrix} \beta \\ \gamma \end{pmatrix} \in \mathbb{R}^{m+p} \right), \\
&\implies \|H\|_2 \leq \frac{2(1 + \nu\Lambda_X^2 + \Lambda_D^2)}{\nu}. \quad (\text{C.8})
\end{aligned}$$

□

## D Oracle Properties: the Key to Prove Consistency

The key to our analysis for Split LBISS and LBI is to deal with the *Oracle* properties, i.e. properties assuming  $S$  is known. First, let  $(\beta^o, \gamma^o)$  form an *Oracle solution* of minimizing  $\ell$ , namely

$$(\beta^o, \gamma^o) \in \arg \min_{\substack{\beta, \gamma \\ \gamma_{Sc}=0}} \ell(\beta, \gamma). \quad (\text{D.1})$$

which implies

$$\begin{aligned}
\nabla_\beta \ell(\beta^o, \gamma^o) &= X^* (X\beta^o - y) + D^T (D\beta^o - \gamma^o) / \nu = 0, \\
\nabla_{\gamma_S} \ell(\beta^o, \gamma^o) &= (\gamma_S^o - D_S \beta^o) / \nu = 0.
\end{aligned} \quad (\text{D.2})$$

Obviously  $\ell(P_L \beta^o, \gamma^o) = \ell(\beta^o, \gamma^o)$ , thus we can assume that  $\beta^o \in L$ , and actually

$$(\beta^o, \gamma^o) \in \arg \min_{\substack{\beta, \gamma \\ \beta \in L, \gamma_{Sc}=0}} \ell(\beta, \gamma). \quad (\text{D.3})$$

### D.1 Oracle Dynamics of Split LBISS

Define the *Oracle Dynamics* of Split LBISS (C.3) as

$$\rho'_{Sc}(t) = \gamma'_{Sc}(t) \equiv 0, \quad (\text{D.4a})$$

$$\dot{\beta}'(t) / \kappa = -X^* (X\beta'(t) - y) - D^T (D\beta'(t) - \gamma'(t)) / \nu, \quad (\text{D.4b})$$

$$\dot{\rho}'_S(t) + \dot{\gamma}'_S(t) / \kappa = -(\gamma'_S(t) - D_S \beta'(t)) / \nu, \quad (\text{D.4c})$$

$$\rho'_S(t) \in \partial \|\gamma'_S(t)\|_1, \quad (\text{D.4d})$$

where  $\rho'_S(0) = \gamma'_S(0) = 0 \in \mathbb{R}^s$ ,  $\beta'(0) = 0 \in \mathbb{R}^p$ . Besides, we require “ $\beta'(t) \in L$ ”. This dynamics can be viewed as an *Oracle* version of Split LBISS (C.3), with  $S$  known and  $\rho_{Sc}(t)$ ,  $\gamma_{Sc}(t)$  set to be 0. We first expect and prove  $(\beta'(t), \gamma'(t))$  converges to  $(\beta^o, \gamma^o)$  as  $t$  evolves. Let

$$d_\beta(t) := \beta'(t) - \beta^o, \quad d_\gamma(t) := \gamma'(t) - \gamma^o, \quad d(t) = \sqrt{\|d_{\gamma,S}(t)\|_2^2 + \|d_\beta(t)\|_2^2}. \quad (\text{D.5})$$

Adding (D.2) to (D.4b) and (D.4c), the Oracle Dynamics can be reformulated as

$$\rho'_{Sc}(t) = \gamma'_{Sc}(t) \equiv 0, \quad (\text{D.6a})$$

$$\begin{pmatrix} 0 \\ \dot{\rho}'_S(t) \end{pmatrix} + \frac{1}{\kappa} \begin{pmatrix} \dot{\beta}'(t) \\ \dot{\gamma}'_S(t) \end{pmatrix} = -H_{(\beta,S),(\beta,S)} \begin{pmatrix} d_\beta(t) \\ d_{\gamma,S}(t) \end{pmatrix}, \quad (\text{D.6b})$$

$$\rho'_S(t) \in \partial \|\gamma'_S(t)\|_1, \quad (\text{D.6c})$$

Define the *potential function* of the Oracle Dynamics (D.6) as

$$\Psi(t) := D^{\rho'_S(t)}(\gamma_S^o, \gamma'_S(t)) + d(t)^2 / (2\kappa),$$

where  $d(t)$  is defined in (D.5), and the Bregman distance

$$D^{\rho'_S(t)}(\gamma_S^o, \gamma'_S(t)) := \|\gamma_S^o\|_1 - \|\gamma'_S(t)\|_1 - \langle \gamma_S^o - \gamma'_S(t), \rho'_S(t) \rangle = \|\gamma_S^o\|_1 - \langle \gamma_S^o, \rho'_S(t) \rangle.$$

**Lemma 8** (Generalized Bihari's inequality). *For all  $t \geq 0$  we have*

$$\frac{d}{dt} \Psi(t) \leq -\lambda_H F^{-1}(\Psi(t)),$$

where  $\gamma_{\min}^o := \min(|\gamma_j^o| : \gamma_j^o \neq 0)$ , and

$$F(x) := \frac{x}{2\kappa} + \begin{cases} 0, & 0 \leq x < (\gamma_{\min}^o)^2, \\ 2x/\gamma_{\min}^o, & (\gamma_{\min}^o)^2 \leq x < s(\gamma_{\min}^o)^2, \\ 2\sqrt{sx}, & x \geq s(\gamma_{\min}^o)^2, \end{cases}$$

$$F^{-1}(x) := \inf(y : F(y) \geq x) \quad (y \geq 0).$$

*Proof of Lemma 8.* Since

$$\begin{pmatrix} \beta'(t) \\ \gamma'(t) \end{pmatrix}, \begin{pmatrix} \beta^o \\ \gamma^o \end{pmatrix} \in L \oplus \mathbb{R}^s \oplus \{0\}^{m-s},$$

by (D.3) and Pythagorean Theorem,

$$\begin{aligned} \ell(\beta'(t), \gamma'(t)) &= \frac{1}{2n} \left\| \begin{pmatrix} y \\ 0 \end{pmatrix} - \begin{pmatrix} X & 0 \\ -\sqrt{n/\nu}D & I_m \end{pmatrix} \begin{pmatrix} \beta'(t) \\ \gamma'(t) \end{pmatrix} \right\|_2^2 \\ &= \frac{1}{2n} \left\| \begin{pmatrix} X & 0 \\ -\sqrt{n/\nu}D & I_m \end{pmatrix} \begin{pmatrix} \beta'(t) \\ \gamma'(t) \end{pmatrix} - \begin{pmatrix} X & 0 \\ -\sqrt{n/\nu}D & I_m \end{pmatrix} \begin{pmatrix} \beta^o \\ \gamma^o \end{pmatrix} \right\|_2^2 \\ &\quad + \frac{1}{2n} \left\| \begin{pmatrix} y \\ 0 \end{pmatrix} - \begin{pmatrix} X & 0 \\ -\sqrt{n/\nu}D & I_m \end{pmatrix} \begin{pmatrix} \beta^o \\ \gamma^o \end{pmatrix} \right\|_2^2 \\ &= L(t) + \text{constant (independent of } t), \quad (\text{D.7}) \end{aligned}$$

where

$$\begin{aligned} L(t) &:= \frac{1}{2n} \left\| \begin{pmatrix} X & 0 \\ -\sqrt{n/\nu}D & I_m \end{pmatrix} \begin{pmatrix} d_\beta(t) \\ d_\gamma(t) \end{pmatrix} \right\|_2^2 = \frac{1}{2} (d_\beta(t)^T, d_\gamma(t)^T) H \begin{pmatrix} d_\beta(t) \\ d_\gamma(t) \end{pmatrix} \\ &= \frac{1}{2} (d_\beta(t)^T, d_{\gamma,S}(t)^T) H_{(\beta,S),(\beta,S)} \begin{pmatrix} d_\beta(t) \\ d_{\gamma,S}(t) \end{pmatrix}. \quad (\text{D.8}) \end{aligned}$$

Noting  $\gamma_j(t) \cdot \dot{\rho}_j(t) \equiv 0$  for each  $j$ , by (D.6c) and (D.8) we have

$$\begin{aligned} \frac{d}{dt} \Psi(t) &= \langle -\gamma_S^o, \dot{\rho}_S'(t) \rangle + d_{\gamma,S}(t)^T \dot{\gamma}_S(t)/\kappa + d_\beta(t)^T \dot{\beta}'(t)/\kappa \\ &= \left\langle \begin{pmatrix} d_\beta(t) \\ d_{\gamma,S}(t) \end{pmatrix}, \begin{pmatrix} 0 \\ \dot{\rho}_S'(t) \end{pmatrix} + \frac{1}{\kappa} \begin{pmatrix} \dot{\beta}'(t) \\ \dot{\gamma}_S'(t) \end{pmatrix} \right\rangle = -2L(t). \end{aligned} \quad (\text{D.9})$$

Thus it suffices to show

$$F\left(\frac{2}{\lambda_H} L(t)\right) \geq \Psi(t).$$

Since  $\|\gamma_S^o\|_1 - \langle \gamma_S^o, \rho_S'(t) \rangle = 0$  if  $\|\gamma_S'(t) - \gamma_S^o\|_2^2 < (\gamma_{\min}^o)^2$ , and

$$\begin{aligned} \|\gamma_S^o\|_1 - \langle \gamma_S^o, \rho_S'(t) \rangle &\leq 2 \sum_{j \in N(t)} |\gamma_j^o| \quad (N(t) := \{j : \text{sign}(\gamma_j'(t)) \neq \text{sign}(\gamma_j^o)\}) \\ &\leq \begin{cases} \frac{2}{\gamma_{\min}^o} \sum_{j \in N(t)} (\gamma_j^o)^2 \leq \frac{2}{\gamma_{\min}^o} \|\gamma_S'(t) - \gamma_S^o\|_2^2 \\ 2\sqrt{s} \sum_{j \in N(t)} (\gamma_j^o)^2 \leq 2\sqrt{s} \|\gamma_S'(t) - \gamma_S^o\|_2^2. \end{cases} \end{aligned}$$

Thus

$$\Psi(t) - \frac{1}{2\kappa} \left( \|d_{\gamma,S}(t)\|_2^2 + \|d_\beta(t)\|_2^2 \right) \leq F\left(\|d_{\gamma,S}(t)\|_2^2\right) - \frac{1}{2\kappa} \|d_{\gamma,S}(t)\|_2^2.$$

It suffice to show

$$F\left(\frac{2}{\lambda_H}L(t)\right) \geq F\left(\|d_{\gamma,S}(t)\|_2^2\right) + \frac{1}{2\kappa}\|d_\beta(t)\|_2^2,$$

which is true since by Assumption 1

$$2L(t) = (d_\beta(t)^T, d_{\gamma,S}(t)^T) \cdot H_{(\beta,S),(\beta,S)} \cdot \begin{pmatrix} d_\beta(t) \\ d_{\gamma,S}(t) \end{pmatrix} \geq \lambda_H \cdot d(t)^2, \quad (\text{D.10})$$

and by  $F(\cdot + x) \geq F(\cdot) + x/(2\kappa)$

$$F(d(t)^2) = F\left(\|d_\beta(t)\|_2^2 + \|d_{\gamma,S}(t)\|_2^2\right) \geq F\left(\|d_{\gamma,S}(t)\|_2^2\right) + \frac{1}{2\kappa}\|d_\beta(t)\|_2^2.$$

□

**Proposition 3.** Let  $\gamma_{\min}^o := \min(|\gamma_j^o| : \gamma_j^o \neq 0)$ . For

$$t \geq \tau_\infty(\mu) := \frac{1}{\kappa\lambda_H} \log \frac{1}{\mu} + \frac{2\log s + 4 + d(0)/\kappa}{\lambda_H\gamma_{\min}^o} \quad (0 < \mu < 1), \quad (\text{D.11})$$

we have

$$d(t) \leq \mu\gamma_{\min}^o \implies \text{sign}(\gamma'_S(t)) = \text{sign}(\gamma_S^o), \text{ if } \gamma_j^o \neq 0 \text{ for } j \in S. \quad (\text{D.12})$$

For  $t \geq 0$ , we have

$$d(t) \leq \min\left(\frac{4\sqrt{s} + d(0)/\kappa}{\lambda_H t}, \sqrt{\frac{2(1 + \nu\Lambda_X^2 + \Lambda_D^2)}{\lambda_H \nu}} \cdot d(0)\right). \quad (\text{D.13})$$

*Proof of Proposition 3.* Noting (D.7) and that  $\ell(\beta'(t), \gamma'(t))$  is *non-increasing*, we know  $L(t)$  is *non-increasing*. (D.9) tells that  $\Psi(t)$  is *non-increasing* since  $L(t) \geq 0$ . If  $L(t) = 0$  for  $t = \tau_\infty(\mu)$ , by (D.10) and the fact that  $L(t)$  is *non-increasing*, we have

$$d(t)^2 \leq \frac{2}{\lambda_H} L(t)^2 = 0 \quad (t \geq \tau_\infty(\mu)).$$

Therefore (D.12) holds for  $t \geq \tau_\infty(\mu)$ . Now assume that  $L(t) > 0$  for  $t = \tau_\infty(\mu)$  (and hence for  $0 \leq t \leq \tau_\infty(\mu)$ ), then  $\Psi(t)$  is *strictly decreasing* on  $[0, \tau_\infty(\mu)]$ . Besides,  $F$  is *strictly increasing* and *continuous* on  $[(\gamma_{\min}^o)^2, +\infty)$ . Moreover,

$$F(d(0)^2) \geq F(\|\gamma_S^o\|_2^2) + \|\beta^o\|_2^2/(2\kappa) \geq \Psi(0),$$

$$d(0)^2 \geq \|\gamma_S^o\|_2^2 \geq s(\gamma_{\min}^o)^2,$$

If there does not exist some  $t \leq \tau_\infty(\mu)$  satisfying (D.12), then for  $0 \leq t \leq \tau_\infty(\mu)$ ,

$$\Psi(t) \begin{cases} \geq d(t)^2/(2\kappa) \geq \mu^2(\gamma_{\min}^o)^2/(2\kappa) > 0, & \text{if } \kappa < +\infty, \\ > 0, & \text{if } \kappa = +\infty, \end{cases}$$

which also implies that  $F^{-1}(\Psi(t)) > 0$ . By Lemma 8,

$$\begin{aligned} \lambda_H \tau_\infty(\mu) &\leq \int_0^{\tau_\infty(\mu)} \frac{-\frac{d}{dt}\Psi(t)}{F^{-1}(\Psi(t))} dt = \int_{\Psi(\tau_\infty(\mu))}^{\Psi(0)} \frac{dx}{F^{-1}(x)} \\ &\leq \left( \int_{\mu^2(\gamma_{\min}^o)^2/(2\kappa)}^{(\gamma_{\min}^o)^2/(2\kappa)} + \int_{(\gamma_{\min}^o)^2/(2\kappa)}^{F((\gamma_{\min}^o)^2)} + \int_{F((\gamma_{\min}^o)^2)}^{F(s(\gamma_{\min}^o)^2)} + \int_{F(s(\gamma_{\min}^o)^2)}^{F(d(0)^2)} \right) \frac{dx}{F^{-1}(x)} \\ &\leq \int_{\mu^2(\gamma_{\min}^o)^2/(2\kappa)}^{(\gamma_{\min}^o)^2/(2\kappa)} \frac{dx}{2\kappa x} + \int_{(\gamma_{\min}^o)^2/(2\kappa)}^{F((\gamma_{\min}^o)^2)} \frac{1}{(\gamma_{\min}^o)^2} dx + \int_{(\gamma_{\min}^o)^2}^{s(\gamma_{\min}^o)^2} \frac{dF(x)}{x} + \int_{s(\gamma_{\min}^o)^2}^{d(0)^2} \frac{dF(x)}{x} \\ &= \frac{1}{2\kappa} \log \frac{1}{\mu^2} + \frac{2}{\gamma_{\min}^o} + \int_{(\gamma_{\min}^o)^2}^{s(\gamma_{\min}^o)^2} \left( \frac{1}{2\kappa x} + \frac{2}{\gamma_{\min}^o x} \right) dx + \int_{s(\gamma_{\min}^o)^2}^{d(0)^2} \left( \frac{1}{2\kappa x} + \frac{\sqrt{s}}{x\sqrt{x}} \right) dx \\ &< \frac{1}{2\kappa} \log \frac{1}{\mu^2} + \frac{2}{\gamma_{\min}^o} + \frac{1}{2\kappa} \log \frac{d(0)^2}{(\gamma_{\min}^o)^2} + \frac{2\log s}{\gamma_{\min}^o} + \frac{2}{\gamma_{\min}^o} \\ &\leq \frac{1}{\kappa} \log \frac{1}{\mu} + \frac{2\log s + 4 + d(0)/\kappa}{\gamma_{\min}^o}, \end{aligned}$$

contradicting with the definition of  $\tau_\infty(\mu)$ . Thus (D.12) holds for some  $0 \leq \tau \leq \tau_\infty(\mu)$ . If  $\kappa = +\infty$ , we see that for  $t \geq \tau_\infty(\mu)$ ,  $\Psi(t) \leq \Psi(\tau) = 0$ . Then  $-2L(t)$ , the derivative of  $\Psi(t)$ , is 0 (which means  $d(t) = 0$ ) when  $t \geq \tau_\infty(\mu)$ , and (D.12) holds. If  $\kappa < +\infty$ , just note that for  $t \geq \tau$ ,

$$d(t)^2/(2\kappa) \leq \Psi(t) \leq \Psi(\tau) = d(\tau)^2/(2\kappa) \implies d(t) \leq d(\tau) \leq \mu\gamma_{\min}^o.$$

So (D.12) holds for  $t \geq \tau_\infty(\mu)$ .

For any  $t > 0$ , if  $L(t) = 0$ , then  $d(t) = 0$  and (D.13) holds. If  $L(t) > 0$ , let  $C = \sqrt{2L(t)/\lambda_H} > 0$ , then for any  $0 \leq t' \leq t$ ,

$$\frac{d}{dt'}\Psi(t') = -2L(t') \leq -2L(t) = -\lambda_H C^2.$$

Besides, for  $\tilde{F}(x) = x/(2\kappa) + 2\sqrt{s}x \geq F(x)$ , by Lemma 8 we have

$$\frac{d}{dt'}\Psi(t') \leq -\lambda_H F^{-1}(\Psi(t')) \leq -\lambda_H \tilde{F}^{-1}(\Psi(t')).$$

By (D.9) and the fact that

$$\tilde{F}(d(0)^2) \geq \tilde{F}(\|\gamma_S^o\|_2^2) + \|\beta^o\|_2^2/(2\kappa) \geq \Psi(0),$$

we have that, if  $d(0) > C$ , then

$$\begin{aligned} \lambda_H t &\leq \int_0^t \frac{-\frac{d}{dt'}\Psi(t')}{\max(C^2, \tilde{F}^{-1}(\Psi(t')))} dt' = \int_{\Psi(t)}^{\Psi(0)} \frac{dx}{\max(C^2, \tilde{F}^{-1}(x))} \\ &\leq \int_{\tilde{F}(0)}^{\tilde{F}(d(0)^2)} \frac{dx}{\max(C^2, \tilde{F}^{-1}(x))} = \int_{\tilde{F}(0)}^{\tilde{F}(C^2)} \frac{dx}{C^2} + \int_{C^2}^{d(0)^2} \frac{d\tilde{F}(x)}{x} \\ &= \frac{C^2/(2\kappa) + 2\sqrt{s}C}{C^2} + \int_{C^2}^{d(0)^2} \left( \frac{1}{2\kappa x} + \frac{\sqrt{s}}{x\sqrt{x}} \right) dx \\ &\leq \frac{4\sqrt{s}}{C} + \frac{1}{2\kappa} \left( 1 + \log \frac{d(0)^2}{C^2} \right) \leq \frac{4\sqrt{s} + d(0)/\kappa}{C}. \end{aligned}$$

If  $d(0) \leq C$ , then similarly

$$\begin{aligned} \lambda_H t &\leq \int_{\tilde{F}(0)}^{\tilde{F}(d(0)^2)} \frac{dx}{\max(C^2, \tilde{F}^{-1}(x))} \leq \int_{\tilde{F}(0)}^{\tilde{F}(d(0)^2)} \frac{dx}{C^2} \\ &= \frac{d(0)^2/(2\kappa) + 2\sqrt{s} \cdot d(0)}{C^2} \leq \frac{4\sqrt{s} + d(0)/\kappa}{C}. \end{aligned}$$

Combining it with (D.10), we have

$$d(t)^2 \leq \frac{2}{\lambda_H} L(t) = \frac{2}{\lambda_H} \cdot \frac{\lambda_H C^2}{2} \leq \left( \frac{4\sqrt{s} + M \cdot d(0)/\kappa}{\lambda_H t} \right)^2.$$

Besides, noting (C.8), we have

$$\begin{aligned} 2L(0) &= (d_\beta(0)^T, d_{\gamma,S}(0)^T) H_{(\beta,S),(\beta,S)} \begin{pmatrix} d_\beta(0) \\ d_{\gamma,S}(0) \end{pmatrix} \\ &\leq \|H\|_2 \cdot \left\| \begin{pmatrix} d_\beta(0) \\ d_{\gamma,S}(0) \end{pmatrix} \right\|_2^2 \leq \frac{2(1 + \nu\Lambda_X^2 + \Lambda_D^2)}{\nu} \cdot d(0)^2. \end{aligned}$$

Thus

$$d(t)^2 \leq \frac{2}{\lambda_H} L(t) \leq \frac{2}{\lambda_H} L(0) \leq \frac{2(1 + \nu\Lambda_X^2 + \Lambda_D^2)}{\lambda_H \nu} \cdot d(0)^2.$$

Thus (D.13) holds.  $\square$

## D.2 Oracle Iteration of Split LBI

Similarly, we define the *Oracle Iteration* of Split LBI as an *Oracle* version of Split LBI (C.2), with  $S$  known and  $\rho_{k,S^c}, \gamma_{k,S^c}$  set to be 0. Define

$$\Psi_k := \|\gamma_S^o\|_1 - \langle \gamma_S^o, \rho_{k,S} \rangle + \|\gamma_{k,S} - \gamma_S^o\|_2^2 / (2\kappa) + \|\beta_k - \beta^o\|_2^2 / (2\kappa).$$

Then we have

**Lemma 9** (Discrete Generalized Bihari's inequality). *Suppose  $\kappa\alpha\|H\|_2 < 2$  and  $\lambda'_H = \lambda_H(1 - \kappa\alpha\|H\|_2/2)$ . For all  $k$  we have*

$$\Psi_{k+1} - \Psi_k \leq -\alpha\lambda'_H F^{-1}(\Psi_k),$$

where  $\gamma_{\min}^o, F(x), F^{-1}(x)$  are defined the same as in Lemma 8.

*Proof of Lemma 9.* The proof is almost a discrete version of the continuous case. The only non-trivial thing is to show that

$$\Psi_{k+1} - \Psi_k \leq -2\alpha(1 - \kappa\alpha\|H\|_2/2) L_k, \text{ where}$$

$$L_k := \frac{1}{2} (d_{k,\beta}^T, d_{k,\gamma,S}^T) H_{(\beta,S),(\beta,S)} \begin{pmatrix} d_{k,\beta} \\ d_{k,\gamma,S} \end{pmatrix}, \begin{pmatrix} d_{k,\beta} \\ d_{k,\gamma,S} \end{pmatrix} := \begin{pmatrix} \beta'_k - \beta^o \\ \gamma'_{k,S} - \gamma_S^o \end{pmatrix}.$$

By (C.2), we have

$$-\alpha H_{(\beta,S),(\beta,S)} \begin{pmatrix} d_{k,\beta} \\ d_{k,\gamma,S} \end{pmatrix} = \begin{pmatrix} 0 \\ \rho'_{k+1,S} - \rho'_{k,S} \end{pmatrix} + \frac{1}{\kappa} \begin{pmatrix} \beta'_{k+1} - \beta'_k \\ \gamma'_{k+1,S} - \gamma'_{k,S} \end{pmatrix}.$$

Noting  $(\rho'_{k+1,S} - \rho'_{k,S})^T \gamma'_{k+1,S} \geq 0$  and multiplying  $(d_{k,\beta}^T, d_{k,\gamma,S}^T)$  on both sides, we have

$$\begin{aligned} -2\alpha L_k &= d_{\gamma,k,S}^T (\rho'_{k+1,S} - \rho'_{k,S}) + \frac{1}{\kappa} \begin{pmatrix} d_{k,\beta} \\ d_{k,\gamma,S} \end{pmatrix}^T \begin{pmatrix} \beta'_{k+1} - \beta'_k \\ \gamma'_{k+1,S} - \gamma'_{k,S} \end{pmatrix} \\ &\geq -(\rho'_{k+1,S} - \rho'_{k,S})^T (\gamma'_{k+1,S} - \gamma'_{k,S}) - (\rho'_{k+1,S} - \rho'_{k,S})^T \gamma_S^o \\ &\quad + \frac{1}{\kappa} \begin{pmatrix} d_{k,\beta} \\ d_{k,\gamma,S} \end{pmatrix}^T \begin{pmatrix} \beta'_{k+1} - \beta'_k \\ \gamma'_{k+1,S} - \gamma'_{k,S} \end{pmatrix}. \end{aligned}$$

Thus

$$\begin{aligned} \Psi_{k+1} - \Psi_k &= -(\rho'_{k+1,S} - \rho'_{k,S})^T \gamma_S^o + \frac{1}{2\kappa} \left( \left\| \begin{pmatrix} d_{k+1,\beta} \\ d_{k+1,\gamma,S} \end{pmatrix} \right\|_2^2 - \left\| \begin{pmatrix} d_{k,\beta} \\ d_{k,\gamma,S} \end{pmatrix} \right\|_2^2 \right) \\ &= -(\rho'_{k+1,S} - \rho'_{k,S})^T \gamma_S^o + \frac{1}{2\kappa} \begin{pmatrix} \beta'_{k+1} - \beta'_k \\ \gamma'_{k+1,S} - \gamma'_{k,S} \end{pmatrix}^T \left( \begin{pmatrix} \beta'_{k+1} - \beta'_k \\ \gamma'_{k+1,S} - \gamma'_{k,S} \end{pmatrix} + 2 \begin{pmatrix} d_{k,\beta} \\ d_{k,\gamma,S} \end{pmatrix} \right) \\ &\leq -2\alpha L_k + (\rho'_{k+1,S} - \rho'_{k,S})^T (\gamma'_{k+1,S} - \gamma'_{k,S}) + \frac{1}{2\kappa} \left\| \begin{pmatrix} \beta'_{k+1} - \beta'_k \\ \gamma'_{k+1,S} - \gamma'_{k,S} \end{pmatrix} \right\|_2^2 \\ &\leq -2\alpha L_k + \frac{\kappa}{2} \left\| \begin{pmatrix} 0 \\ \rho'_{k+1,S} - \rho'_{k,S} \end{pmatrix} + \frac{1}{\kappa} \begin{pmatrix} \beta'_{k+1} - \beta'_k \\ \gamma'_{k+1,S} - \gamma'_{k,S} \end{pmatrix} \right\|_2^2 \\ &= -(d_{k,\beta}^T, d_{k,\gamma,S}^T) \left( \alpha H_{(\beta,S),(\beta,S)} - \frac{\kappa\alpha^2}{2} H_{(\beta,S),(\beta,S)}^2 \right) \begin{pmatrix} d_{k,\beta} \\ d_{k,\gamma,S} \end{pmatrix} \\ &\leq -\alpha \left( 1 - \frac{\kappa\alpha}{2} \|H_{(\beta,S),(\beta,S)}\|_2 \right) (d_{k,\beta}^T, d_{k,\gamma,S}^T) H_{(\beta,S),(\beta,S)} \begin{pmatrix} d_{k,\beta} \\ d_{k,\gamma,S} \end{pmatrix} \\ &\leq -2\alpha(1 - \kappa\alpha\|H\|_2/2) L_k. \end{aligned}$$

□

**Proposition 4.** *Suppose  $\kappa\alpha\|H\|_2 < 2$  and  $\lambda'_H = \lambda_H(1 - \kappa\alpha\|H\|_2/2)$ . Let*

$$\gamma_{\min}^o := \min(|\gamma_j^o| : \gamma_j^o \neq 0),$$

$$d_{k,\beta} = \beta'_k - \beta^o, d_{k,\gamma} = \gamma'_k - \gamma^o, d_k = \sqrt{\|d_{k,\beta}\|_2^2 + \|d_{k,\gamma,S}\|_2^2}.$$

Then for any  $k$  such that

$$k\alpha \geq \tau'_\infty(\mu) := \frac{1}{\kappa\lambda'_H} \log \frac{1}{\mu} + \frac{2\log s + 4 + d_0/\kappa}{\lambda'_H\gamma_{\min}^o} + 4\alpha \quad (0 < \mu < 1), \quad (\text{D.14})$$

we have

$$d_k \leq \mu\gamma_{\min}^o \quad (\implies \text{sign}(\gamma'_{k,S}) = \text{sign}(\gamma_S^o)), \text{ if } \gamma_j^o \neq 0 \text{ for } j \in S. \quad (\text{D.15})$$

For any  $k$ , we have

$$d_k \leq \min \left( \frac{4\sqrt{s} + d_0/\kappa}{\lambda'_H k\alpha}, \sqrt{\frac{2(1 + \nu\Lambda_X^2 + \Lambda_D^2)}{\lambda'_H \nu}} \cdot d_0 \right). \quad (\text{D.16})$$

*Proof of Proposition 4.* The proof is almost a discrete version of the continuous case. The only non-trivial thing is described as follows. First, suppose there does not exist  $k \leq \tau'_\infty(\mu)/\alpha$  satisfying (D.15), then for any  $0 \leq \kappa\alpha \leq \tau'_\infty(\mu)$ , we have  $\Psi_k > \mu^2(\gamma_{\min}^o)^2/(2\kappa)$ . Letting  $k_0 = 0$ , then  $\Psi_{k_0} = \Psi_0 \leq F(d_0^2)$ . Suppose that

$$\begin{aligned} F(d_0^2) &\geq \Psi_{k_0}, \dots, \Psi_{k_1-1} > F(s(\gamma_{\min}^o)^2) \geq \Psi_{k_1}, \dots, \Psi_{k_2-1} > F((\gamma_{\min}^o)^2) \\ &\geq \Psi_{k_2}, \dots, \Psi_{k_3-1} > (\gamma_{\min}^o)^2/(2\kappa) \geq \Psi_{k_3}, \dots, \Psi_{k_4-1} > \mu^2(\gamma_{\min}^o)^2/(2\kappa) \geq \Psi_{k_4}, \dots \end{aligned}$$

Then  $k_4\alpha > \tau'_\infty(\mu)$ . Besides, by Lemma 9,

$$\alpha \leq \frac{\Psi_k - \Psi_{k+1}}{\lambda'_H F^{-1}(\Psi_k)} \quad (0 \leq k\alpha \leq \tau'_\infty(\mu)).$$

Thus  $\lambda'_H(k_4 - 4)\alpha$  is not greater than

$$\begin{aligned} &\left( \sum_{k=k_3}^{k_4-2} + \sum_{k=k_2}^{k_3-2} + \sum_{k=k_1}^{k_2-2} + \sum_{k=k_0}^{k_1-2} \right) \frac{\Psi_k - \Psi_{k+1}}{F^{-1}(\Psi_k)} \leq \sum_{k=k_3}^{k_4-2} \frac{\Psi_k - \Psi_{k+1}}{2\kappa\Psi_k} + \sum_{k=k_2}^{k_3-2} \frac{\Psi_k - \Psi_{k+1}}{(\gamma_{\min}^o)^2} \\ &+ \sum_{k=k_1}^{k_2-2} \frac{F(\Delta_k) - F(\Delta_{k+1})}{\Delta_k} + \sum_{k=k_0}^{k_1-2} \frac{F(\Delta_k) - F(\Delta_{k+1})}{\Delta_k} \quad (\Delta_k := F^{-1}(\Psi_k)) \\ &= \sum_{k=k_3}^{k_4-2} \frac{\Psi_k - \Psi_{k+1}}{2\kappa\Psi_k} + \sum_{k=k_2}^{k_3-2} \frac{\Psi_k - \Psi_{k+1}}{(\gamma_{\min}^o)^2} + \sum_{k=k_1}^{k_2-2} \left( \frac{\Delta_k - \Delta_{k+1}}{2\kappa\Delta_k} + \frac{2(\Delta_k - \Delta_{k+1})}{\gamma_{\min}^o\Delta_k} \right) \\ &+ \sum_{k=k_0}^{k_1-2} \left( \frac{\Delta_k - \Delta_{k+1}}{2\kappa\Delta_k} + \frac{2\sqrt{s}(\sqrt{\Delta_k} - \sqrt{\Delta_{k+1}})}{\Delta_k} \right). \end{aligned}$$

By  $(u - v)/u \leq \log(u/v)$  and  $(\sqrt{u} - \sqrt{v})/u \leq 1/\sqrt{v} - 1/\sqrt{u}$  for  $u \geq v > 0$ , the quantity above is not greater than

$$\begin{aligned} &\frac{\log(\Psi_{k_3}/\Psi_{k_4-1})}{2\kappa} + \frac{\Psi_{k_2} - \Psi_{k_3-1}}{(\gamma_{\min}^o)^2} \\ &+ \frac{\log(\Delta_{k_0}/\Delta_{k_2-1})}{2\kappa} + \frac{2\log(\Delta_{k_1}/\Delta_{k_2-1})}{\gamma_{\min}^o} + 2\sqrt{s} \left( \frac{1}{\sqrt{\Delta_{k_1-1}}} - \frac{1}{\sqrt{\Delta_{k_0}}} \right) \\ &< \frac{\log(1/\mu^2)}{2\kappa} + \frac{2\gamma_{\min}^o}{(\gamma_{\min}^o)^2} + \frac{\log(d_0^2/(\gamma_{\min}^o)^2)}{2\kappa} + \frac{2\log s}{\gamma_{\min}^o} + \frac{2\sqrt{s}}{\sqrt{s(\gamma_{\min}^o)^2}}. \end{aligned}$$

Therefore we get

$$\lambda'_H(\tau'_\infty(\mu) - 4\alpha) < \lambda'_H(k_4 - 4)\alpha < \frac{1}{\kappa} \log \frac{1}{\mu} + \frac{2\log s + 4 + d_0/\kappa}{\gamma_{\min}^o},$$

a contradiction with the definition of  $\tau'_\infty(\mu)$ . So there exists some  $k \leq \tau'_\infty(\mu)/\alpha$  satisfying (D.15). Then continue to imitate the proof in the continuous version, we obtain (D.15) for all  $t \geq \tau'_\infty(\mu)$ . The proof of (D.16) follows the same spirit.  $\square$

## E Proofs of Consistency of Split LBI

*Proof of Theorem 2 and 3.* They are merely discrete versions of proofs of the following Theorem 4 and 5, but applying Lemma 9 and Proposition 4 instead of Lemma 8 and Proposition 3.  $\square$

**Theorem 4** (Consistency of Split (LB)ISS). *Under Assumption 1 and 2, suppose  $\kappa$  is large enough to satisfy (2.12). Let*

$$\bar{\tau} := \frac{\eta}{8\sigma} \cdot \frac{\lambda_D}{\Lambda_X} \sqrt{\frac{n}{\log m}}. \quad (\text{E.1})$$

*Then with probability not less than  $1 - 6/m - 3 \exp(-4n/5)$ , we have all the following properties.*

1. No-false-positive: *The solution has no false-positive, i.e.  $\text{supp}(\gamma(t)) \subseteq S$ , for  $0 \leq t \leq \bar{\tau}$ .*
2. Sign consistency of  $\gamma(t)$ : *Once the  $\gamma_{\min}^*$  condition*

$$\gamma_{\min}^* := (D_S \beta^*)_{\min} \geq \frac{16\sigma}{\eta \lambda_H} \cdot \frac{\Lambda_X \Lambda_D}{\lambda_D^2} (2 \log s + 5 + \log(8\Lambda_D)) \sqrt{\frac{\log m}{n}} \quad (\text{E.2})$$

*holds, then  $\gamma(t)$  has sign consistency at  $\bar{\tau}$ , i.e.*

$$\text{sign}(\gamma(\bar{\tau})) = \text{sign}(D\beta^*),$$

3.  $\ell_2$  consistency of  $\gamma(t)$ : *For  $0 \leq t \leq \bar{\tau}$ ,*

$$\|\gamma(t) - D\beta^*\|_2 \leq \frac{5\sqrt{s}}{\lambda_H t} + \frac{2\sigma}{\lambda_H} \cdot \frac{\Lambda_X}{\lambda_D} \sqrt{\frac{s \log m}{n}},$$

*Consequently,*

$$\|\gamma(\bar{\tau}) - D\beta^*\|_2 \leq \frac{42\sigma}{\eta \lambda_H} \cdot \frac{\Lambda_X}{\lambda_D} \sqrt{\frac{s \log m}{n}}.$$

4.  $\ell_2$  consistency of  $\beta(t)$ : *For  $0 \leq t \leq \bar{\tau}$ ,*

$$\begin{aligned} \|\beta(t) - \beta^*\|_2 &\leq \frac{5\sqrt{s}}{\lambda_H t} + \frac{2\sigma}{\lambda_H} \cdot \frac{\lambda_1 \Lambda_X + \Lambda_X^2}{\lambda_1 \lambda_D^2} \sqrt{\frac{s \log m}{n}} + \frac{2\sigma}{\lambda_1} \sqrt{\frac{r' \log m}{n}} \\ &\quad + \nu \cdot 2\sigma \cdot \frac{\lambda_1 \Lambda_X + \Lambda_X^2}{\lambda_1 \lambda_D^2}. \end{aligned}$$

*Consequently,*

$$\begin{aligned} \|\beta(\bar{\tau}) - \beta^*\|_2 &\leq \frac{42\sigma}{\eta \lambda_H} \cdot \frac{\lambda_1 \Lambda_X (1 + \lambda_D) + \Lambda_X^2}{\lambda_1 \lambda_D^2} \sqrt{\frac{s \log m}{n}} + \frac{2\sigma}{\lambda_1} \sqrt{\frac{r' \log m}{n}} \\ &\quad + \nu \cdot 2\sigma \cdot \frac{\lambda_1 \Lambda_X + \Lambda_X^2}{\lambda_1 \lambda_D^2}. \end{aligned}$$

**Theorem 5** (Consistency of revised version of Split LBISS). *Under Assumption 1 and 2, suppose  $\kappa$  is large enough to satisfy (2.12), and  $\bar{\tau}$  is defined the same as in Theorem 4. Define*

$$S(t) := \text{supp}(\gamma(t)), \quad P_{S(t)} := P_{\ker(D_{S(t)^c})} = I - D_{S(t)^c}^\dagger D_{S(t)^c}, \quad \tilde{\beta}(t) := P_{S(t)} \beta(t).$$

*If  $S(t)^c = \emptyset$ , define  $P_{S(t)} = I$ . Then we have the following properties.*

1. Sign consistency of  $\tilde{\beta}(t)$ : *If the  $\gamma_{\min}^*$  condition (E.2) holds, then with probability not less than  $1 - 8/m - 3 \exp(-4n/5)$ ,*

$$\text{sign}(D\tilde{\beta}(\bar{\tau})) = \text{sign}(D\beta^*).$$



2.  $\ell_2$  consistency of  $\tilde{\beta}(t)$ : With probability not less than  $1 - 8/m - 2r'/m^2 - 3\exp(-4n/5)$ , we have that for  $0 \leq t \leq \bar{\tau}$ ,

$$\begin{aligned} \|\tilde{\beta}(t) - \beta^*\|_2 &\leq \left( \frac{10\sqrt{s}}{\lambda_H t} + \frac{2\sigma}{\lambda_H} \cdot \frac{\Lambda_X \Lambda_D}{\lambda_D^3} \sqrt{\frac{s \log m}{n}} \right) \\ &\quad + \frac{2\sigma}{\lambda_H} \left( \frac{\Lambda_X}{\lambda_D^2} + \frac{\lambda_H \lambda_D^2 + \Lambda_X^2}{\lambda_1 \lambda_D^2} \right) \sqrt{\frac{r' \log m}{n}} + 2 \|D_{S(t)^c}^\dagger D_{S(t)^c \cap S} \beta^*\|_2. \end{aligned}$$

Consequently, if additionally  $S(\bar{\tau}) = S$ , then the last term on the right hand side drops for  $t = \bar{\tau}$ , and we can easily obtain

$$\begin{aligned} \|\tilde{\beta}(\bar{\tau}) - \beta^*\|_2 &\leq \frac{80\sigma}{\eta \lambda_H} \cdot \frac{\Lambda_X (\Lambda_D + \lambda_D^2)}{\lambda_D^3} \sqrt{\frac{s \log m}{n}} \\ &\quad + \frac{2\sigma}{\lambda_H} \left( \frac{\Lambda_X}{\lambda_D^2} + \frac{\lambda_H \lambda_D^2 + \Lambda_X^2}{\lambda_1 \lambda_D^2} \right) \sqrt{\frac{r' \log m}{n}}. \end{aligned}$$

Before proving Theorem 4 and 5, we need the following lemmas.

**Lemma 10.** Suppose  $\Sigma_{S,S} \succeq \lambda_\Sigma I$ . For  $\beta^o \in L$  and  $\gamma_S^o \in \mathbb{R}^s$  satisfying (D.2), we have

$$\begin{aligned} \|\beta^o - \beta^*\|_2^2 &= \|\delta^o - \delta^*\|_2^2 + \|\xi^o - \xi^*\|_2^2, \text{ where} \\ \delta^o - \delta^* &:= V^T (\beta^o - \beta^*), \quad \xi^o - \xi^* = V_1^T \tilde{V}^T (\beta^o - \beta^*), \end{aligned} \quad (\text{E.3})$$

and

$$\delta^o - \delta^* = \underbrace{\left( \nu B^{-1} + B^{-1} \Lambda U_S^T \Sigma_{S,S}^{-1} U_S \Lambda B^{-1} \right) V^T X^* (I - U_1 U_1^T)}_{\triangleq B_\delta} \epsilon, \text{ with } \|B_\delta\|_2 \leq \frac{\Lambda_X}{\sqrt{n} \cdot \lambda_\Sigma \lambda_D^2}, \quad (\text{E.4})$$

$$\xi^o - \xi^* = \underbrace{n^{-1/2} \Lambda_1^{-1} U_1^T (I - X V B_\delta)}_{\triangleq B_\xi} \epsilon, \text{ with } \|B_\xi\|_2 \leq \frac{\lambda_\Sigma \lambda_D^2 + \Lambda_X^2}{\sqrt{n} \cdot \lambda_1 \lambda_\Sigma \lambda_D^2}. \quad (\text{E.5})$$

Besides, we have

$$\gamma_S^o - \gamma_S^* = \underbrace{\Sigma_{S,S}^{-1} U_S \Lambda B^{-1} V^T X^* (I - U_1 U_1^T)}_{\triangleq B_\gamma} \epsilon, \text{ with } \|B_\gamma\|_2 \leq \frac{\Lambda_X}{\sqrt{n} \cdot \lambda_\Sigma \lambda_D}. \quad (\text{E.6})$$

*Proof.* By Lemma 3 and  $\beta^o - \beta^* \in L$ , we have (E.3). By (D.2), we have

$$\gamma_S^o - \gamma_S^* = D_S (\beta^o - \beta^*) = U_S \Lambda (\delta^o - \delta^*), \quad (\text{E.7})$$

and

$$X^* \epsilon + D_S^T (\gamma_S^o - \gamma_S^*) / \nu = (X^* X + D^T D / \nu) (\beta^o - \beta^*),$$

i.e.

$$\begin{aligned} X^* \epsilon + V \Lambda U_S^T (\gamma_S^o - \gamma_S^*) / \nu &= (X^* X + V \Lambda^2 V^T / \nu) (V (\delta^o - \delta^*) + \tilde{V} V_1 (\xi^o - \xi^*)) \\ &= (X^* X V + V \Lambda^2 / \nu) (\delta^o - \delta^*) + \sqrt{n} X^* U_1 \Lambda_1 (\xi^o - \xi^*). \end{aligned} \quad (\text{E.8})$$

Left multiplying  $\Lambda_1^{-2} V_1^T \tilde{V}^T$  on both sides of (E.8) leads to

$$\xi^o - \xi^* = \frac{1}{\sqrt{n}} \Lambda_1^{-1} U_1^T (\epsilon - X V (\delta^o - \delta^*)). \quad (\text{E.9})$$

Then left multiplying  $V^T$  on both sides of (E.8) leads to

$$\begin{aligned} V^T X^* \epsilon + \Lambda U_S^T (\gamma_S^o - \gamma_S^*) / \nu &= (V^T X^* X V + \Lambda^2 / \nu) (\delta^o - \delta^*) + \sqrt{n} V^T X^* U_1 \Lambda_1 \cdot \frac{1}{\sqrt{n}} \Lambda_1^{-1} U_1^T (\epsilon - X V (\delta^o - \delta^*)) \\ &= (V^T X^* (I - U_1 U_1^T) X V + \Lambda^2 / \nu) (\delta^o - \delta^*) + V^T X^* U_1 U_1^T \epsilon. \end{aligned}$$

Recalling the definition of  $B$  in Lemma 4, the equation above implies

$$\delta^o - \delta^* = B^{-1} \Lambda U_S^T (\gamma_S^o - \gamma_S^*) + \nu B^{-1} V^T X^* (I - U_1 U_1^T) \epsilon. \quad (\text{E.10})$$

Plugging it into (E.7), we obtain  $\gamma_S^o - \gamma_S^* = B_\gamma \epsilon$ . Then noting  $B \succeq \lambda_D^2 I$ , we have

$$\|B_\gamma\|_2 \leq \left\| \Sigma_{S,S}^{-1} \right\|_2 \cdot 1 \cdot \left\| \Lambda B^{-1} \right\|_2 \cdot 1 \cdot \|X^*\|_2 \cdot \|I - U_1 U_1^T\|_2 \leq \frac{\Lambda_X}{\sqrt{n} \cdot \lambda_\Sigma \lambda_D}.$$

so (E.6) holds. Now by (E.10) we have  $\delta^o - \delta^* = B_\delta \epsilon$ . Noting (A.8) and  $\Sigma_{S,S} \succeq \lambda_\Sigma I$ , we have

$$\begin{aligned} U_S \Lambda B^{-1/2} \cdot B^{-1/2} \Lambda U_S^T &\preceq (1 - \lambda_\Sigma \nu) I \\ \iff B^{-1/2} \Lambda U_S^T \cdot U_S \Lambda B^{-1/2} &\preceq (1 - \lambda_\Sigma \nu) I \iff \Lambda U_S^T U_S \Lambda \preceq (1 - \lambda_\Sigma \nu) B. \end{aligned}$$

Thus

$$\nu B^{-1} + B^{-1} \Lambda U_S^T \Sigma_{S,S}^{-1} U_S \Lambda B^{-1} \preceq \nu B^{-1} + \frac{1}{\lambda_\Sigma} B^{-1} \Lambda U_S^T U_S \Lambda B^{-1} \preceq \frac{1}{\lambda_\Sigma} B^{-1},$$

which immediately leads to (E.4). Finally, combining (E.9) with (E.4) we have (E.5).  $\square$

**Lemma 11** (No-false-positive condition for Split LBISS). *For the Oracle Dynamics (D.6), if there is  $\tau > 0$ , such that for  $0 \leq t \leq \tau$  the inequality*

$$\left\| H_{S^c, (\beta, S)} H_{(\beta, S), (\beta, S)}^\dagger \left( \begin{pmatrix} 0_p \\ \rho_S'(t) \end{pmatrix} + \frac{1}{\kappa} \begin{pmatrix} \beta'(t) \\ \gamma_S'(t) \end{pmatrix} - t \begin{pmatrix} X^* \epsilon \\ 0_s \end{pmatrix} \right) \right\|_\infty < 1 \quad (\text{E.11})$$

*holds, then the solution path of the original dynamics (C.3) has no false-positive for  $0 \leq t \leq \tau$ .*

*Proof of Lemma 11.* It is easy to see that

$$\begin{pmatrix} 0_p \\ \dot{\rho}(t) \end{pmatrix} + \frac{1}{\kappa} \begin{pmatrix} \dot{\beta}(t) \\ \dot{\gamma}(t) \end{pmatrix} = H \left( \begin{pmatrix} \beta(t) \\ \gamma(t) \end{pmatrix} - \begin{pmatrix} \beta^* \\ \gamma^* \end{pmatrix} \right) + \begin{pmatrix} X^* \epsilon \\ 0_m \end{pmatrix}. \quad (\text{E.12})$$

Now let

$$\bar{\tau} := \inf (t \geq 0 : \|\rho_{S^c}(t)\|_\infty = 1).$$

It suffices to show  $\bar{\tau} > \tau$ . For  $0 \leq t < \bar{\tau}$ , we have  $\gamma_{S^c}(t) = 0$ , which also implies  $\rho_S(t) = \rho_S'(t)$  and  $\gamma_S(t) = \gamma_S'(t)$ . Hence by (E.12) we have

$$\begin{aligned} \begin{pmatrix} 0_p \\ \dot{\rho}_S'(t) \end{pmatrix} + \frac{1}{\kappa} \begin{pmatrix} \dot{\beta}'(t) \\ \dot{\gamma}_S'(t) \end{pmatrix} &= -H_{(\beta, S), (\beta, S)} \left( \begin{pmatrix} \beta'(t) \\ \gamma_S'(t) \end{pmatrix} - \begin{pmatrix} \beta^* \\ \gamma_S^* \end{pmatrix} \right) + \begin{pmatrix} X^* \epsilon \\ 0_s \end{pmatrix}, \\ \dot{\rho}_{S^c}(t) &= -H_{S^c, (\beta, S)} \left( \begin{pmatrix} \beta'(t) \\ \gamma_S'(t) \end{pmatrix} - \begin{pmatrix} \beta^* \\ \gamma_S^* \end{pmatrix} \right). \end{aligned} \quad (\text{E.13})$$

We claim that

$$\begin{pmatrix} \beta'(t) \\ \gamma_S'(t) \end{pmatrix} - \begin{pmatrix} \beta^* \\ \gamma_S^* \end{pmatrix} \in L \oplus \mathbb{R}^s = \text{Im} \left( H_{(\beta, S), (\beta, S)}^\dagger \right)$$

(the equality above will be shown at last), so by (E.13) we have

$$\begin{aligned} \begin{pmatrix} \beta'(t) \\ \gamma_S'(t) \end{pmatrix} - \begin{pmatrix} \beta^* \\ \gamma_S^* \end{pmatrix} &= -H_{(\beta, S), (\beta, S)}^\dagger \left( \begin{pmatrix} 0_p \\ \dot{\rho}_S'(t) \end{pmatrix} + \frac{1}{\kappa} \begin{pmatrix} \dot{\beta}'(t) \\ \dot{\gamma}_S'(t) \end{pmatrix} - \begin{pmatrix} X^* \epsilon \\ 0_s \end{pmatrix} \right), \\ \implies \dot{\rho}_{S^c}(t) &= H_{S^c, (\beta, S)} H_{(\beta, S), (\beta, S)}^\dagger \left( \begin{pmatrix} 0_p \\ \dot{\rho}_S'(t) \end{pmatrix} + \frac{1}{\kappa} \begin{pmatrix} \dot{\beta}'(t) \\ \dot{\gamma}_S'(t) \end{pmatrix} - \begin{pmatrix} X^* \epsilon \\ 0_s \end{pmatrix} \right). \end{aligned}$$

Integration on both sides leads to

$$\rho_{S^c}(t) = H_{S^c, (\beta, S)} H_{(\beta, S), (\beta, S)}^\dagger \left( \begin{pmatrix} 0_p \\ \rho_S'(t) \end{pmatrix} + \frac{1}{\kappa} \begin{pmatrix} \beta'(t) \\ \gamma_S'(t) \end{pmatrix} - t \begin{pmatrix} X^* \epsilon \\ 0_s \end{pmatrix} \right) \quad (0 \leq t < \bar{\tau}).$$

Due to the continuity of  $\rho_{S^c}(t)$ ,  $\rho_S'(t)$  (and  $\gamma_S'(t)$ , if  $\kappa < +\infty$ ), the equation above also holds for  $t = \bar{\tau}$ . According to the definition of  $\bar{\tau}$ , we know (E.11) does not hold for  $t = \bar{\tau}$ . Thus  $\bar{\tau} > \tau$ , and the desired result follows.

So it suffices to prove

$$L \oplus \mathbb{R}^s = \text{Im} \left( H_{(\beta, S), (\beta, S)}^\dagger \right). \quad (\text{E.14})$$

Actually, let  $H_{(\beta, S), (\beta, S)} = U' \Lambda' U'^T$  where  $U'^T U' = I$  and  $\Lambda'$  is an invertible diagonal matrix. It suffices to show  $L \oplus \mathbb{R}^s = \text{Im}(U')$ . First, by the definition of  $H$ , one can easily verify that

$$\text{Im}(U') = \text{Im}(H_{(\beta, S), (\beta, S)}) \subseteq (\text{Im}(X^T) + \text{Im}(D^T)) \oplus \mathbb{R}^s = L \oplus \mathbb{R}^s.$$

On the other hand, assume that  $(U', \tilde{U}')$  is an orthogonal square matrix. For any  $\zeta \in L \oplus \mathbb{R}^s$ , since  $P_{\text{Im}(U')} \zeta \in \text{Im}(U') \subseteq L \oplus \mathbb{R}^s$ , we have  $P_{\text{Im}(\tilde{U}')} \zeta = \zeta - P_{\text{Im}(U')} \zeta \in L \oplus \mathbb{R}^s$ , and (2.2) tells us

$$\begin{aligned} 0 &= \left\| \Lambda'^{1/2} U'^T P_{\text{Im}(\tilde{U}')} \zeta \right\|_2^2 \geq \lambda_H \left\| P_{\text{Im}(\tilde{U}')} \zeta \right\|_2^2 \implies P_{\text{Im}(\tilde{U}')} \zeta = 0 \\ &\implies \zeta = P_{\text{Im}(U')} \zeta + P_{\text{Im}(\tilde{U}')} \zeta = P_{\text{Im}(U')} \zeta \in \text{Im}(U'). \end{aligned}$$

Thus (E.14) holds.  $\square$

*Proof of Theorem 4.* By Lemma 6, (A.3), (E.5) and (E.6), we have that with probability not less than  $1 - 4s/m^2 \geq 1 - 4/m$ ,

$$\|\gamma_S^o - \gamma_S^*\|_\infty < \frac{2\sigma}{\lambda_H} \cdot \frac{\Lambda_X}{\lambda_D} \sqrt{\frac{\log m}{n}}, \quad (\text{E.15})$$

$$\|\xi^o - \xi^*\|_\infty < \frac{2\sigma}{\lambda_H} \cdot \frac{\lambda_H \lambda_D^2 + \Lambda_X^2}{\lambda_1 \lambda_D^2} \sqrt{\frac{\log m}{n}}. \quad (\text{E.16})$$

By (A.4) and (E.3) to (E.6), with probability not less than  $1 - 3 \exp(-4n/5)$ ,

$$\begin{aligned} \|\epsilon\|_2 &\leq 2\sigma\sqrt{n}, \text{ which implies} \\ \|\gamma_S^o - \gamma_S^*\|_2 &< \frac{2\sigma}{\lambda_H} \cdot \frac{\Lambda_X}{\lambda_D}, \quad \|\delta^o - \delta^*\|_2 < \frac{2\sigma}{\lambda_H} \cdot \frac{\Lambda_X}{\lambda_D^2}, \quad \|\xi^o - \xi^*\|_2 < \frac{2\sigma}{\lambda_H} \cdot \frac{\lambda_H \lambda_D^2 + \Lambda_X^2}{\lambda_1 \lambda_D^2}. \end{aligned} \quad (\text{E.17})$$

The inequalities above also imply

$$\|\beta^o - \beta^*\|_2 \leq \|\delta^o - \delta^*\|_2 + \|\xi^o - \xi^*\|_2 < \frac{2\sigma}{\lambda_H} \left( \frac{\Lambda_X}{\lambda_D^2} + \frac{\lambda_H \lambda_D^2 + \Lambda_X^2}{\lambda_1 \lambda_D^2} \right), \quad (\text{E.18})$$

and

$$\begin{aligned} d(0) &= \sqrt{\|\gamma_S^o\|_2^2 + \|\beta^o\|_2^2} \leq \|\gamma_S^*\|_2 + \|\beta^*\|_2 + \|\gamma_S^o - \gamma_S^*\|_2 + \|\beta^o - \beta^*\|_2 \\ &< (1 + \Lambda_D) \|\beta^*\|_2 + \frac{2\sigma}{\lambda_H} \left( \frac{\Lambda_X}{\lambda_D} + \frac{\Lambda_X}{\lambda_D^2} + \frac{\lambda_H \lambda_D^2 + \Lambda_X^2}{\lambda_1 \lambda_D^2} \right). \end{aligned} \quad (\text{E.19})$$

From now, we assume all the inequalities above hold. The condition on  $\kappa$  now tells us

$$\kappa \geq \frac{4}{\eta} \left( 1 + \frac{1}{\lambda_D} + \frac{\Lambda_X}{\lambda_1 \lambda_D} \right) \left( 1 + \sqrt{\frac{2(1 + \nu \Lambda_X^2 + \Lambda_D^2)}{\lambda_H \nu}} \right) \cdot d(0) (\geq d(0)). \quad (\text{E.20})$$

Now we prove the *No-false-positive* property. By Lemma 11, it suffices to show that for  $0 \leq t \leq \bar{\tau}$ , (E.11) holds with probability not less than  $1 - 2/m$ . By (A.7), (A.15) and (D.13),

$$\begin{aligned}
& \frac{1}{\kappa} \left\| H_{S^c, (\beta, S)} H_{(\beta, S), (\beta, S)}^\dagger \begin{pmatrix} \beta'(t) \\ \gamma'_S(t) \end{pmatrix} \right\|_\infty \\
&= \left\| \left( -D_{S^c} A^\dagger + \Sigma_{S^c, S} \Sigma_{S, S}^{-1} D_S \right) A^\dagger \beta'(t) + \Sigma_{S^c, S} \Sigma_{S, S}^{-1} \gamma'_S(t) \right\|_\infty / \kappa \\
&\leq \left\| D_{S^c} A^\dagger \beta'(t) \right\|_\infty / \kappa + \left\| \Sigma_{S^c, S} \Sigma_{S, S}^{-1} D_S A^\dagger \beta'(t) \right\|_\infty / \kappa + \left\| \gamma'_S(t) \right\|_\infty / \kappa \\
&\leq 2 \left\| D A^\dagger \right\|_2 \cdot \left\| \beta'(t) \right\|_2 / \kappa + \left\| \gamma'_S(t) \right\|_2 / \kappa \leq \left( 2 \left( \frac{1}{\lambda_D} + \frac{\Lambda_X}{\lambda_D \lambda_1} \right) + 1 \right) \sqrt{\left\| \beta'(t) \right\|_2^2 + \left\| \gamma'_S(t) \right\|_2^2} / \kappa \\
&\leq 2 \left( 1 + \frac{1}{\lambda_D} + \frac{\Lambda_X}{\lambda_D \lambda_1} \right) (d(0) + d(t)) / \kappa \\
&\leq 2 \left( 1 + \frac{1}{\lambda_D} + \frac{\Lambda_X}{\lambda_D \lambda_1} \right) \left( 1 + \sqrt{\frac{2(1 + \nu \Lambda_X^2 + \Lambda_D^2)}{\lambda_H \nu}} \right) d(0) / \kappa \leq \frac{\eta}{2}.
\end{aligned}$$

Besides, by (A.15) we have

$$\begin{aligned}
\left\| H_{S^c, (\beta, S)} H_{(\beta, S), (\beta, S)}^\dagger \begin{pmatrix} X^* \epsilon \\ 0 \end{pmatrix} \right\|_\infty &= \left\| \left( -D_{S^c} + \Sigma_{S^c, S} \Sigma_{S, S}^\dagger D_S \right) A^\dagger X^* \epsilon \right\|_\infty \\
&\leq \left\| D_{S^c} A^\dagger X^* \epsilon \right\|_\infty + \left\| D_S A^\dagger X^* \epsilon \right\|_\infty \leq 2 \left\| D A^\dagger X^* \epsilon \right\|_\infty.
\end{aligned}$$

By (A.8),  $DA^\dagger D^T = U \Lambda B^{-1} \Lambda U^T$  and  $\Lambda^2 \preceq B \preceq (1 + \nu \Lambda_X^2 / \lambda_D^2) \Lambda^2$ , therefore 1 is an upper bound of the largest eigenvalue of  $DA^\dagger D^T$ , and  $1/(1 + \nu \Lambda_X^2 / \lambda_D^2)$  is a lower bound of the smallest nonzero eigenvalue of  $DA^\dagger D^T$ . Then

$$\begin{aligned}
DA^\dagger X^* (DA^\dagger X^*)^T &= \frac{1}{n\nu} DA^\dagger (A - D^T D) A^\dagger D^T \\
&= \frac{1}{n\nu} \left( DA^\dagger D^T - (DA^\dagger D^T)^2 \right) \preceq \frac{1}{n\nu} \min \left( \frac{1}{4}, \frac{\nu \Lambda_X^2 / \lambda_D^2}{(1 + \nu \Lambda_X^2 / \lambda_D^2)^2} \right) I \preceq \frac{\Lambda_X^2}{n \cdot \lambda_D^2} I.
\end{aligned}$$

By (A.3), with probability not less than  $1 - 2/m$ , for any  $0 \leq t \leq \bar{\tau}$ ,

$$\left\| H_{S^c, (\beta, S)} H_{(\beta, S), (\beta, S)}^\dagger \cdot t \begin{pmatrix} X^* \epsilon \\ 0 \end{pmatrix} \right\|_\infty \leq 2\bar{\tau} \left\| DA^\dagger X^* \epsilon \right\|_\infty \leq 2\bar{\tau} \cdot 2\sigma \cdot \sqrt{\frac{\Lambda_X^2}{n \cdot \lambda_D^2}} \cdot \sqrt{\log m} < \frac{\eta}{2}.$$

Combining the results above with Assumption 2, we have for  $0 \leq t \leq \bar{\tau}$ , (E.11) holds with probability not less than  $1 - 2/m$ , and we have the No-false-positive property (which tells that  $(\beta(t), \gamma_S(t))$  coincides with that of the Oracle Dynamics for  $0 \leq t \leq \bar{\tau}$ ).

Then we prove the *sign consistency* of  $\gamma(t)$ . If the  $\gamma_{\min}^*$  condition (E.2) holds, by (E.15),

$$\left\| \gamma_S^o - \gamma_S^* \right\|_\infty \leq \frac{2\sigma}{\lambda_H} \cdot \frac{\Lambda_X}{\lambda_D} \sqrt{\frac{\log m}{n}} \leq \frac{\gamma_{\min}^*}{2} \implies \gamma_{\min}^o \geq \frac{1}{2} \gamma_{\min}^*. \quad (\text{E.21})$$

Thus  $\text{sign}(\gamma_S^o) = \text{sign}(\gamma_S^*)$ , and

$$\gamma_{\min}^o \geq \frac{1}{2} \gamma_{\min}^* \geq \frac{2 \log s + 5}{\lambda_H \bar{\tau}} > \frac{2 \log s + 4 + d(0)/\kappa}{\lambda_H \bar{\tau}} \implies \bar{\tau} > \frac{2 \log s + 4 + d(0)/\kappa}{\lambda_H \gamma_{\min}^o}.$$

By (D.12), the sign consistency of  $\gamma'_S(t)$  holds for

$$t > \inf_{0 < \mu < 1} \left( \frac{1}{\kappa \lambda_H} \log \frac{1}{\mu} + \frac{2 \log s + 4 + d(0)/\kappa}{\lambda_H \gamma_{\min}^o} \right) = \frac{2 \log s + 4 + d(0)/\kappa}{\lambda_H \gamma_{\min}^o},$$

thus also for  $\bar{\tau}$ . Then under the No-false-positive property,

$$\text{sign}(\gamma_S(\bar{\tau})) = \text{sign}(\gamma'_S(\bar{\tau})) = \text{sign}(\gamma_S^o) = \text{sign}(\gamma_S^*),$$

and

$$\text{sign}(\gamma'_{S^c}(\bar{\tau})) = 0 = \text{sign}(\gamma_{S^c}^*).$$

Now we prove the  $\ell_2$  consistency of  $\gamma(t)$ . Under the No-false-positive property, for  $0 \leq t \leq \bar{\tau}$ ,

$$\begin{aligned} \|\gamma(t) - D\beta^*\|_2 &= \|\gamma'_S(t) - \gamma_S^*\|_2 \leq \|d_{\gamma,S}(t)\|_2 + \|\gamma_S^o - \gamma_S^*\|_2 \\ &\leq d(t) + \sqrt{s} \|\gamma_S^o - \gamma_S^*\|_\infty \leq \frac{4\sqrt{s} + d(0)/\kappa}{\lambda_H t} + \frac{2\sigma}{\lambda_H} \cdot \frac{\Lambda_X}{\lambda_D} \sqrt{\frac{s \log m}{n}} \\ &\leq \frac{5\sqrt{s}}{\lambda_H t} + \frac{2\sigma}{\lambda_H} \cdot \frac{\Lambda_X}{\lambda_D} \sqrt{\frac{s \log m}{n}}. \end{aligned}$$

Finally, we prove the  $\ell_2$  consistency of  $\beta(t)$ . Under the No-false-positive property, for  $0 \leq t \leq \bar{\tau}$ ,

$$\|\beta(t) - \beta^*\|_2 = \|\beta'(t) - \beta^*\|_2 \leq d_\beta(t) + \|\beta^o - \beta^*\|_2 \leq d(t) + \|\beta^o - \beta^*\|_2.$$

By Lemma 10 (especially noting (E.10)), we have

$$\begin{aligned} \|\beta^o - \beta^*\|_2 &\leq \|\delta^o - \delta^*\|_2 + \|\xi^o - \xi^*\|_2 \\ &\leq \left\| \frac{1}{\sqrt{n}} \Lambda_1^{-1} U_1^T \epsilon \right\|_2 + \left( 1 + \left\| \frac{1}{\sqrt{n}} \Lambda_1^{-1} U_1^T X V \right\|_2 \right) \cdot \|\delta^o - \delta^*\|_2 \leq \sqrt{r'} \left\| \frac{1}{\sqrt{n}} \Lambda_1^{-1} U_1^T \epsilon \right\|_\infty \\ &\quad + \left( 1 + \frac{\Lambda_X}{\lambda_1} \right) \left( \nu \|B^{-1} V^T X^* (I - U_1 U_1^T) \epsilon\|_2 + \|B^{-1} \Lambda U_S^T\|_2 \cdot \sqrt{s} \|\gamma_S^o - \gamma_S^*\|_\infty \right) \\ &\leq \sqrt{r'} \left\| \frac{1}{\sqrt{n}} \Lambda_1^{-1} U_1^T \epsilon \right\|_\infty + \left( 1 + \frac{\Lambda_X}{\lambda_1} \right) \left( \nu \cdot 2\sigma \cdot \frac{\Lambda_X}{\lambda_D^2} + \frac{1}{\lambda_D} \cdot \sqrt{s} \cdot \frac{2\sigma}{\lambda_H} \cdot \frac{\Lambda_X}{\lambda_D} \sqrt{\frac{\log m}{n}} \right). \end{aligned}$$

By (A.3), with probability not less than  $1 - 2/m$ , we have

$$\left\| \frac{1}{\sqrt{n}} \Lambda_1^{-1} U_1^T \epsilon \right\|_\infty \leq 2\sigma \left\| \frac{1}{\sqrt{n}} \Lambda_1^{-1} U_1^T \right\|_2 \sqrt{\log m} \leq \frac{2\sigma}{\lambda_1} \sqrt{\frac{\log m}{n}}.$$

In this case, combining the inequalities above with  $d(t) \leq 5\sqrt{s}/(\lambda_H t)$ , the desired result follows.  $\square$

*Proof of Theorem 5.* By the proof details of Theorem 4, we know that with probability not less than  $1 - 6/m - 3 \exp(-4n/5)$ , (E.15) to (E.19) hold, meanwhile the solution path has no false-positive for  $0 \leq t \leq \bar{\tau}$ . From now, we assume that these properties are all valid.

First we prove the *sign consistency* of  $\tilde{\beta}(t)$ . If the  $\gamma_{\min}^*$  condition (E.2) holds, then by Theorem 4,  $S(\bar{\tau}) = S^*$  holds, and we have

$$D_{S^c} P_{S(\bar{\tau})} = D_{S^c} (I - D_{S^c}^\dagger D_{S^c}) = 0 \implies \text{sign}(D_{S^c} \tilde{\beta}(\bar{\tau})) = 0 = \text{sign}(D_{S^c} \beta^*).$$

To prove  $\text{sign}(D_S \tilde{\beta}(\bar{\tau})) = \text{sign}(D_S \beta^*)$ , note that

$$\begin{aligned} \|D_S \tilde{\beta}(\bar{\tau}) - D_S \beta^*\|_\infty &= \|D_S (I - D_{S^c}^\dagger D_{S^c}) (\beta'(\bar{\tau}) - \beta^*)\|_\infty \\ &\leq \|D_S (I - D_{S^c}^\dagger D_{S^c}) d_\beta(\bar{\tau})\|_\infty + \|D_S (I - D_{S^c}^\dagger D_{S^c}) (\beta^o - \beta^*)\|_\infty \\ &\leq \|D_S (I - D_{S^c}^\dagger D_{S^c}) d_\beta(\bar{\tau})\|_\infty + \|\gamma_S^o - \gamma_S^*\|_\infty + \|D_S D_{S^c}^\dagger D_{S^c} (\beta^o - \beta^*)\|_\infty. \end{aligned}$$

First, by (E.20),  $\kappa \geq d(0) \geq \|\gamma_S^o\|_2 \geq \gamma_{\min}^o$ , and

$$\bar{\tau} \geq \frac{\log(8\Lambda_D)}{\lambda_H \gamma_{\min}^o} + \frac{2 \log s + 5}{\lambda_H \gamma_{\min}^o} \geq \frac{1}{\kappa \lambda_H} \log(8\Lambda_D) + \frac{2 \log s + 4 + d(0)/\kappa}{\lambda_H \gamma_{\min}^o}.$$

By (D.12), we have  $d(\bar{\tau}) \leq \gamma_{\min}^o/(8\Lambda_D)$ , and thus

$$\begin{aligned} \|D_S (I - D_{S^c}^\dagger D_{S^c}) d_\beta(\bar{\tau})\|_\infty &\leq \|D_S\|_2 \cdot \|I - D_{S^c}^\dagger D_{S^c}\|_2 \cdot \|d_\beta(\bar{\tau})\|_2 \leq \Lambda_D \cdot d(\bar{\tau}) \leq \frac{\gamma_{\min}^o}{8} \leq \frac{\gamma_{\min}^*}{4}. \end{aligned}$$

Besides, by (E.4), we have

$$D_S D_{S^c}^\dagger D_{S^c} (\beta^o - \beta^*) = U_S \Lambda V^T D_{S^c}^\dagger U_{S^c} \Lambda (\delta^o - \delta^*) = U_S \Lambda V^T D_{S^c}^\dagger U_{S^c} \Lambda B_\delta \epsilon$$

with

$$\left\| U_S \Lambda V^T D_{S^c}^\dagger U_{S^c} \Lambda B_\delta \right\|_2 \leq \Lambda_D \left\| D_{S^c}^\dagger \cdot U_{S^c} \Lambda V^T \right\|_2 \cdot \|B_\delta\|_2 \leq \frac{\Lambda_X \Lambda_D}{\sqrt{n} \cdot \lambda_H \lambda_D^2}.$$

By (A.3), with probability not less than  $1 - 2/m$ ,

$$\left\| D_S D_{S^c}^\dagger D_{S^c} (\beta^o - \beta^*) \right\|_\infty < \frac{2\sigma}{\lambda_H} \cdot \frac{\Lambda_X \Lambda_D}{\lambda_D^2} \sqrt{\frac{\log m}{n}} \leq \frac{\gamma_{\min}^*}{4}.$$

Finally, we note (E.21). Then  $\text{sign}(D_S \tilde{\beta}(\bar{\tau})) = \text{sign}(D_S \beta^*)$  holds, since

$$\left\| D_S (\tilde{\beta}(\bar{\tau}) - \beta^*) \right\|_\infty < \frac{\gamma_{\min}^*}{4} + \frac{\gamma_{\min}^*}{2} + \frac{\gamma_{\min}^*}{4} = (D_S \beta^*)_{\min}.$$

Then we prove the  $\ell_2$  consistency of  $\tilde{\beta}(t)$ . For any  $0 \leq t \leq \bar{\tau}$ ,  $S(t) \subseteq S$ , which implies  $D_{S^c} \tilde{\beta}(t) = D_{S^c} \beta^* = 0$ . Then

$$\begin{aligned} \left\| \tilde{\beta}(t) - \beta^* \right\|_2 &\leq \left\| V^T (\tilde{\beta}(t) - \beta^*) \right\|_2 + \left\| V_1^T \tilde{V}^T (\tilde{\beta}(t) - \beta^*) \right\|_2 \\ &\leq \left( \left\| V^T P_{S(t)} (\beta'(t) - \beta^*) \right\|_2 + \left\| V^T (I - P_{S(t)}) \beta^* \right\|_2 \right) \\ &\quad + \left( \left\| V_1^T \tilde{V}^T P_{S(t)} (\beta'(t) - \beta^*) \right\|_2 + \left\| V_1^T \tilde{V}^T (I - P_{S(t)}) \beta^* \right\|_2 \right) \\ &\leq \left\| V^T P_{S(t)} (\beta'(t) - \beta^*) \right\|_2 + \left\| V_1^T \tilde{V}^T P_{S(t)} (\beta'(t) - \beta^*) \right\|_2 + 2 \left\| D_{S(t)^c}^\dagger D_{S(t)^c \cap S} \beta^* \right\|_2. \end{aligned}$$

The first and second term of the right hand side are respectively not greater than

$$\begin{aligned} \left\| V^T P_{S(t)} d_\beta(t) \right\|_2 + \left\| V^T P_{S(t)} (\beta^o - \beta^*) \right\|_2 &\leq \|d_\beta(t)\|_2 + \frac{1}{\lambda_D} \left\| D P_{S(t)} (\beta^o - \beta^*) \right\|_2 \\ &\leq d(t) + \frac{1}{\lambda_D} \left\| D_{S(t)} P_{S(t)} (\beta^o - \beta^*) \right\|_2 \\ &= d(t) + \frac{1}{\lambda_D} \left\| U_{S(t)} \Lambda \left( 1 - V^T D_{S(t)^c}^\dagger U_{S(t)^c} \Lambda \right) (\delta^o - \delta^*) \right\|_2 \end{aligned}$$

(here we use the fact that  $D_{S(t)^c} P_{S(t)} = 0$ ), and

$$\begin{aligned} \left\| V_1^T \tilde{V}^T P_{S(t)} d_\beta(t) \right\|_2 + \left\| V_1^T \tilde{V}^T P_{S(t)} (\beta^o - \beta^*) \right\|_2 \\ \leq \|d_\beta(t)\|_2 + \left\| (\xi^o - \xi^*) - V_1^T \tilde{V}^T D_{S(t)^c}^\dagger D_{S(t)^c} (\beta^o - \beta^*) \right\|_2 \\ \leq d(t) + \|\xi^o - \xi^*\|_2 + \left\| V_1^T \tilde{V}^T D_{S(t)^c}^\dagger U_{S(t)^c} \Lambda (\delta^o - \delta^*) \right\|_2. \end{aligned}$$

Noting (D.13) and (E.16), as well as applying the definition of  $B_\delta$  in Lemma 10, now we only need to show that with probability not less than  $1 - 2/m - 2r'/m^2$ ,

$$\begin{aligned} \left\| U_{S(t)} \Lambda \left( 1 - V^T D_{S(t)^c}^\dagger U_{S(t)^c} \Lambda \right) B_\delta \epsilon \right\|_\infty &\leq \frac{2\sigma}{\lambda_H} \cdot \frac{\Lambda_D \Lambda_X}{\lambda_D^2} \sqrt{\frac{\log m}{n}}, \\ \left\| V_1^T \tilde{V}^T D_{S(t)^c}^\dagger U_{S(t)^c} \Lambda B_\delta \epsilon \right\|_\infty &\leq \frac{2\sigma}{\lambda_H} \cdot \frac{\Lambda_X}{\lambda_D^2} \sqrt{\frac{\log m}{n}}, \end{aligned}$$

which are both true, according to (A.3), as well as (E.4) which leads to

$$\begin{aligned} \left\| U_{S(t)} \Lambda \left( 1 - V^T D_{S(t)^c}^\dagger U_{S(t)^c} \Lambda \right) B_\delta \right\|_2 \\ \leq \Lambda_D \left( 1 + \left\| V^T D_{S(t)^c}^\dagger \cdot U_{S(t)^c} \Lambda V^T \right\|_2 \right) \|B_\delta\|_2 \leq \frac{2\Lambda_X \Lambda_D}{\sqrt{n} \cdot \lambda_H \lambda_D^2}, \end{aligned}$$

and

$$\left\| V_1^T \tilde{V}^T D_{S(t)^c}^\dagger U_{S(t)^c} \Lambda B_\delta \right\|_2 \leq \left\| D_{S(t)^c} \cdot U_{S(t)^c} \Lambda V^T \right\|_2 \cdot \|B_\delta\|_2 \leq \frac{\Lambda_X}{\sqrt{n} \cdot \lambda_H \lambda_D^2}.$$

□
